# Supplementary material for: In silico identification and characterization of sensory motifs in the transcriptional regulators of the ArsR-SmtB family
Source: Royal Society of Chemistry journal article supplement (doi:10.1039/c8mt00082d), 2018-08-24
Supplement: c8mt00082d1.pdf [file c8mt00082d1.pdf]

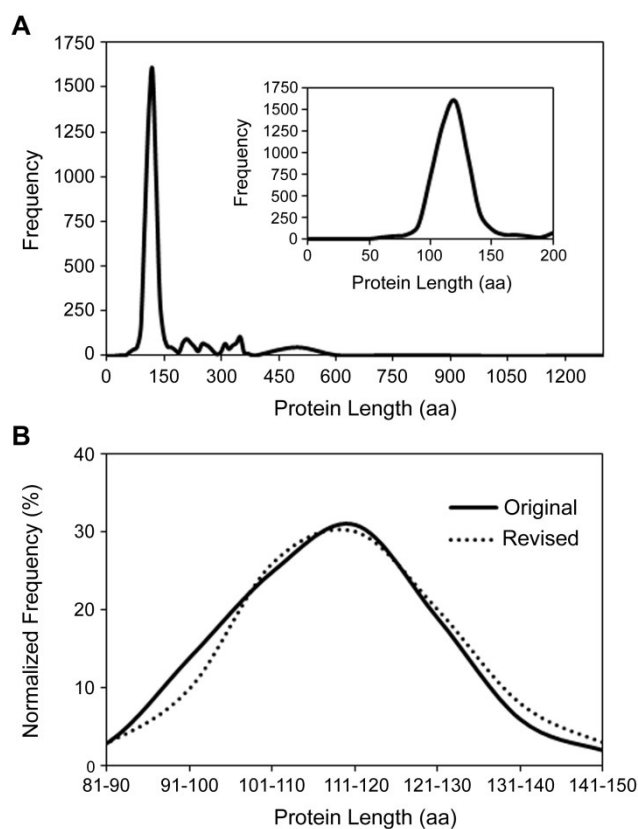

**Supplementary Figure S1.** (A) Distribution of the ArsR-SmtB family protein lengths (in aa) in bacteria and archaea. This protein length distribution is based on 6478 sequences obtained from the Pfam database. Sequences range from 28 to 1210 amino acids. In the inset, the distribution of sequences range from 81 to 150 is highlighted. (B) Two sets of protein sequences (ranges from 81 to 150 aa) - the original set of 5218 sequences and the revised set of 3104 sequences (removing duplicates and near-identical sequences) are overlaid to show the similarities. Smoothed line option was used to generate the graph plots in excel.

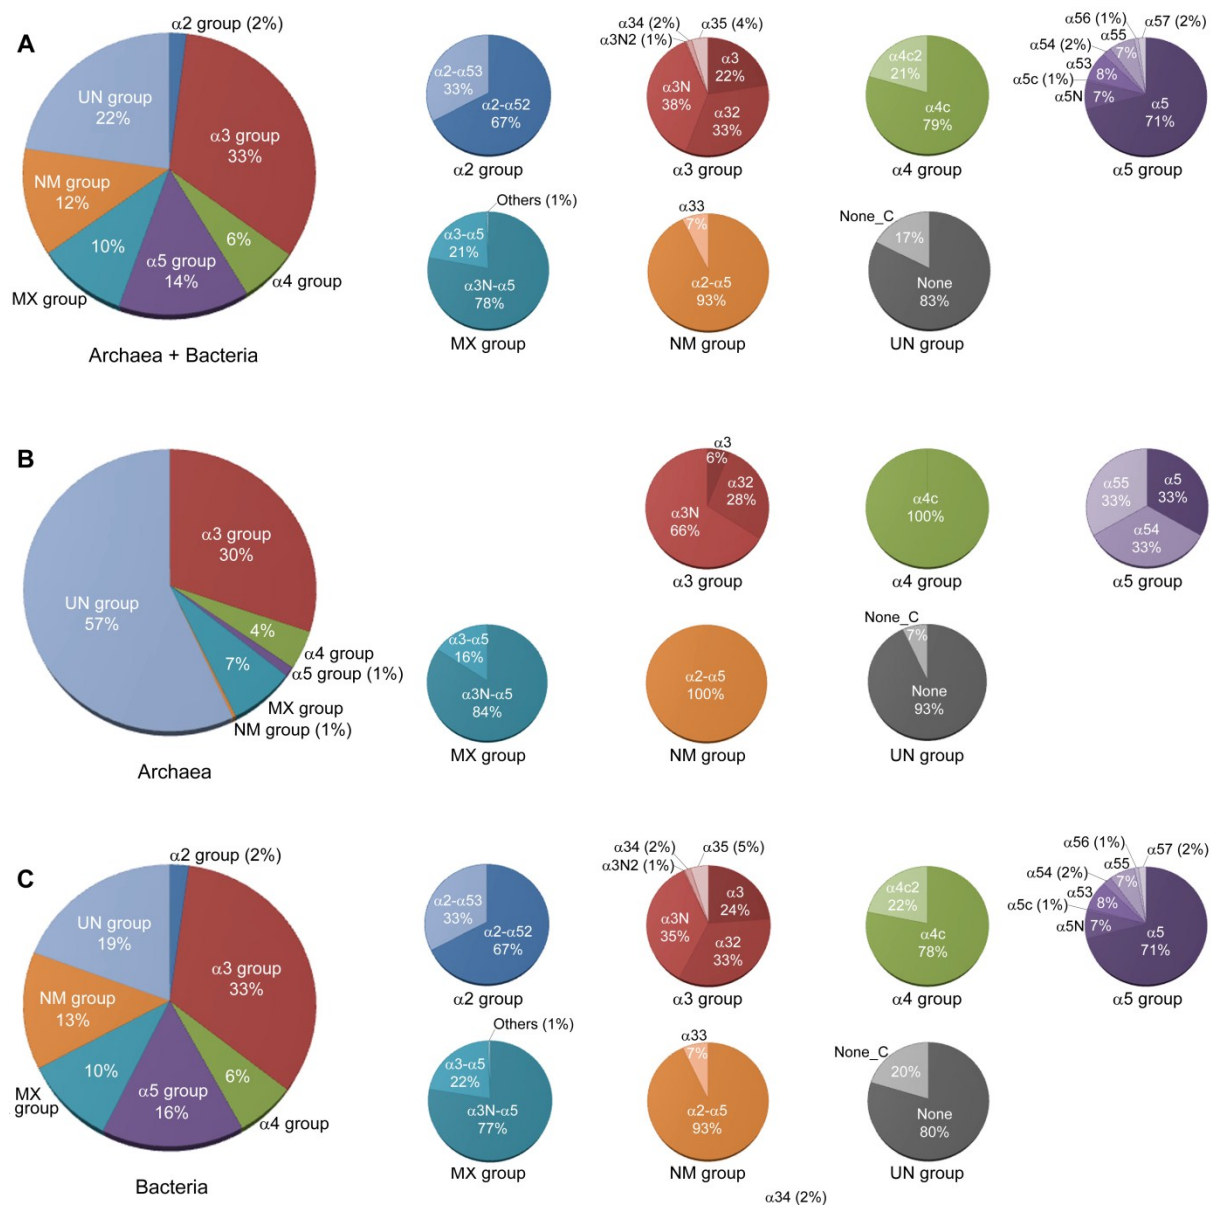

**Supplementary Figure S2.** Distribution (in percentage) of different motifs in seven groups of metal-/nonmetal-binding sites ( $\alpha_2$ ,  $\alpha_3$ ,  $\alpha_4$ ,  $\alpha_5$ , MX, NM, and UN) in (A) all 3104 sequences (archaea and bacteria), (B) 271 archaeal sequences, and (C) 2833 bacterial sequences. This is an expanded version of Figure 1 showing the distribution of motifs (class) in each group. The  $\alpha_2$  group motifs are not found in archaeal sequences, hence not shown.

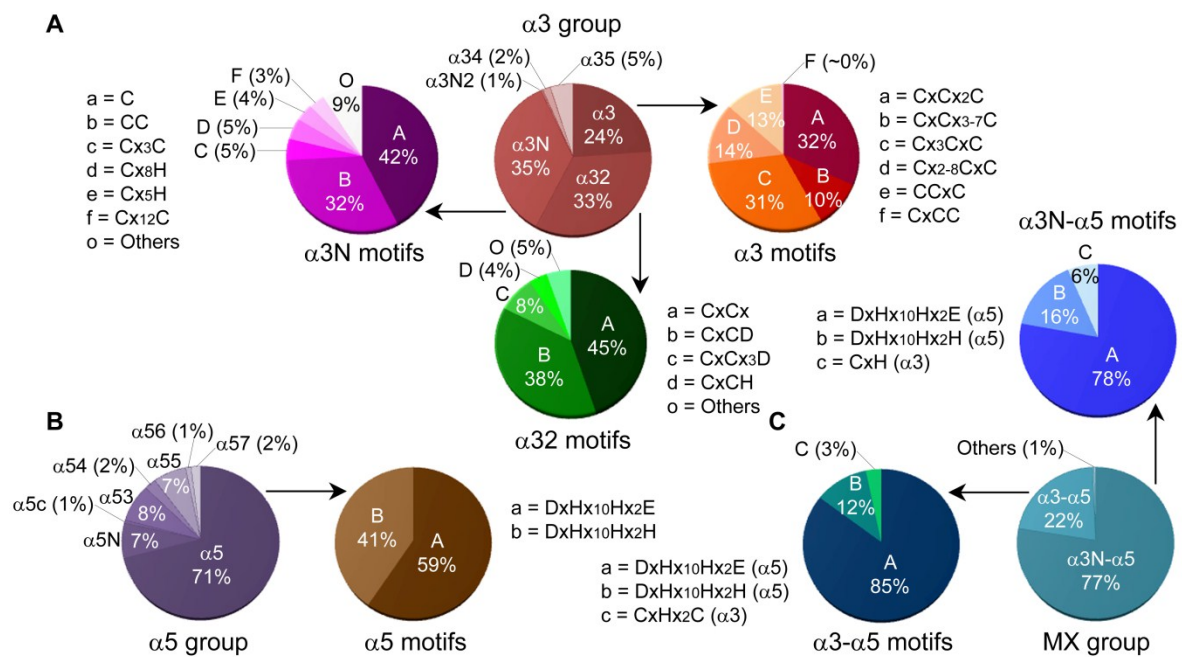

**Supplementary Figure S3.** Distribution (in percentage) of major motif sub-classes found in (A)  $\alpha 3$ , (B)  $\alpha 5$  and (C)  $\alpha 3N$ - $\alpha 5$  class of bacterial sequences shown in Supplementary Figure S2. (A) The detailed distribution of different  $\alpha 3$ ,  $\alpha 32$  and  $\alpha 3N$  motifs found in the bacterial  $\alpha 3$  group. (B) The detailed distribution of different  $\alpha 5$  motifs found in the bacterial  $\alpha 5$  group. (C) The detailed distribution of different  $\alpha 3N$ - $\alpha 5$  and  $\alpha 3$ - $\alpha 5$  motifs found in the bacterial MX group. Different sequence motif sub-classes (denoted in small letters) are shown adjacent to the pie chart of the respective motif figures.

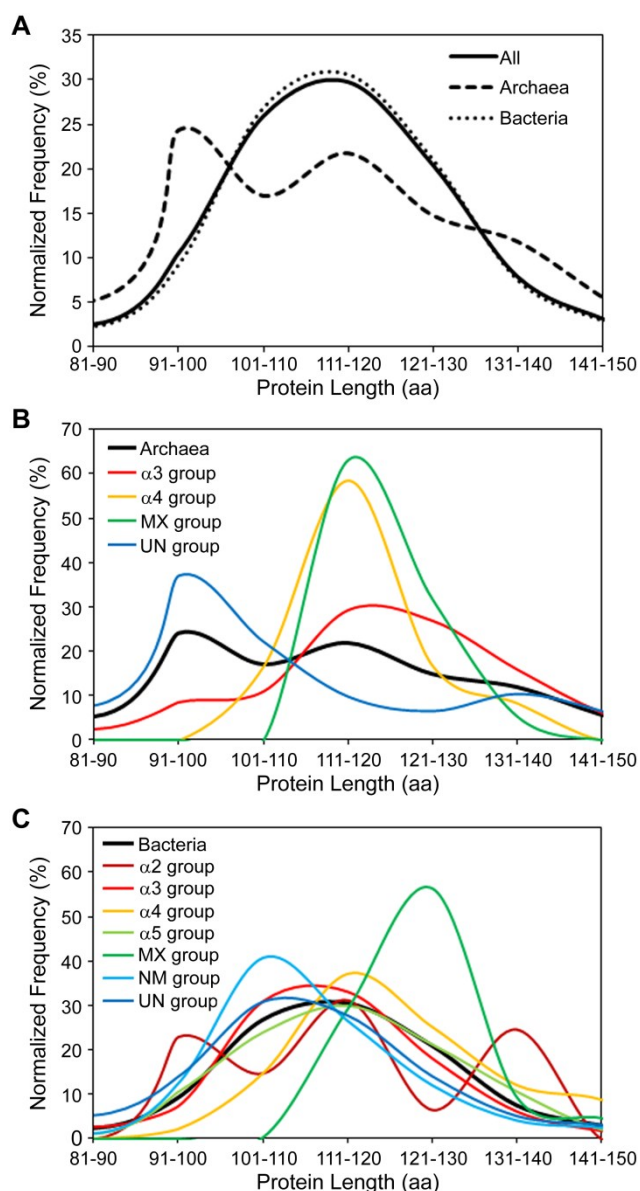

**Supplementary Figure S4.** (A) Three sets of protein sequences (ranges from 81 to 150 aa) - all 3104 sequences of archaea and bacteria, 271 archaeal sequences and 2833 bacterial sequences are overlaid to show relationships. (B) 271 archaeal sequences are overlaid with different group sequences ( $\alpha$ 3,  $\alpha$ 4, MX, and UN) from archaea. The  $\alpha$ 5 and NM group sequences from archaea are not shown due to a low number of occurrences (<5). The  $\alpha$ 2 group sequences were not found in archaea, hence not shown. (C) 2833 bacterial sequences are overlaid with different group sequences ( $\alpha$ 2,  $\alpha$ 3,  $\alpha$ 4,  $\alpha$ 5, MX, NM, and UN) from bacteria. Distribution of the protein lengths in seven groups,  $\alpha$ 2,  $\alpha$ 3,  $\alpha$ 4,  $\alpha$ 5, MX, NM, and UN, are shown in maroon, red, orange, light green, dark green, sky blue and blue colors, respectively. Smoothed line option was used to generate the graph plots in excel.

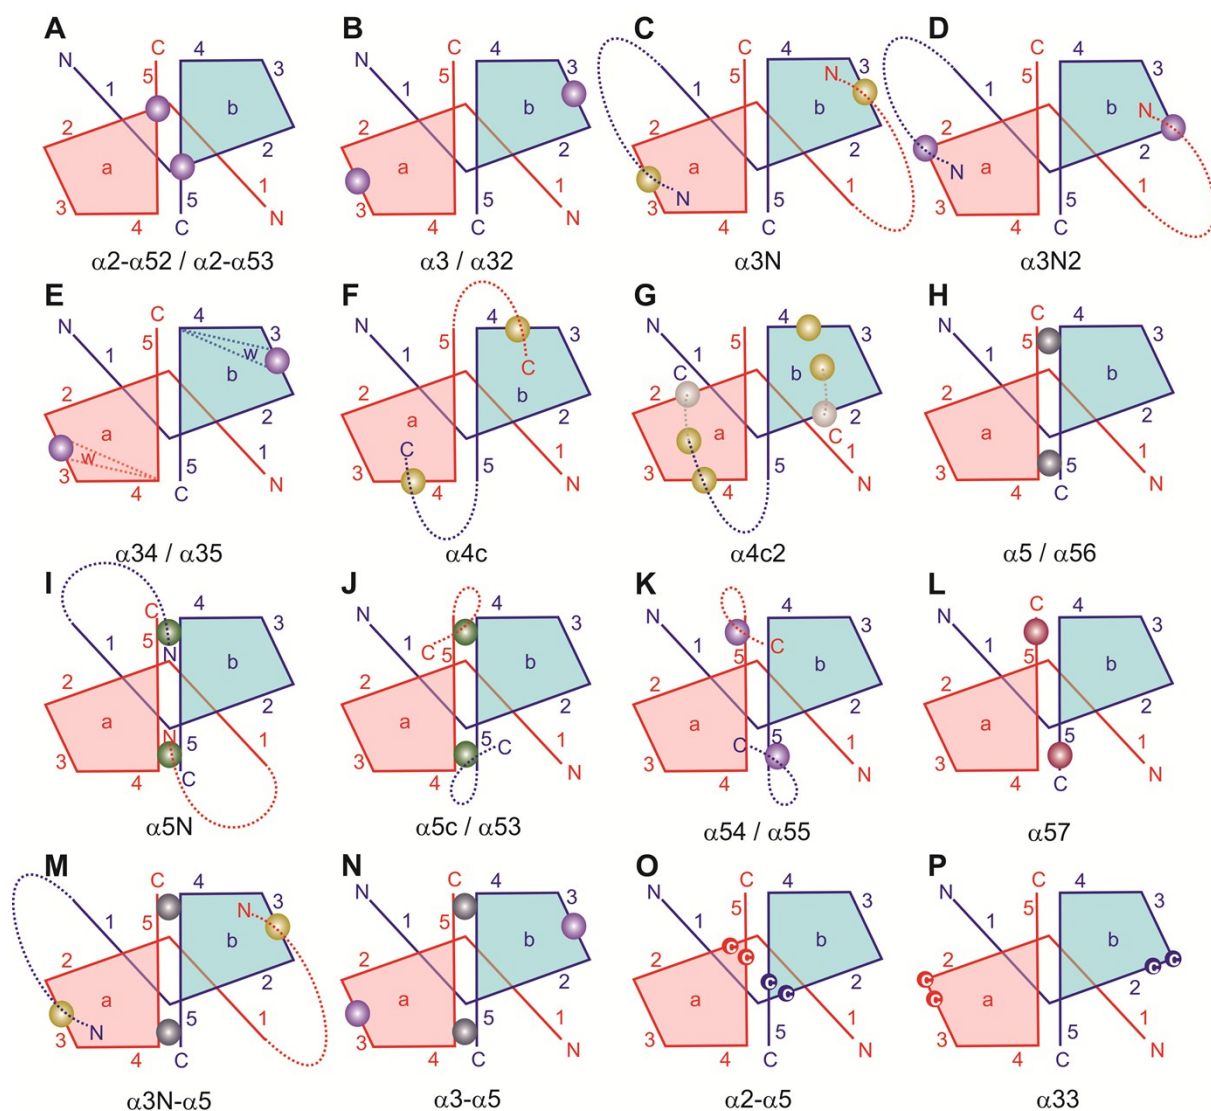

**Supplementary Figure S5.** (A) Cartoon representation of  $\alpha 2-\alpha 52$  or  $\alpha 2-\alpha 53$  metal binding site is shown. Cartoon representation of (B)  $\alpha 3$  or  $\alpha 32$ , (C)  $\alpha 3N$ , (D)  $\alpha 3N2$ , and (E)  $\alpha 34$  or  $\alpha 35$  metal binding sites are shown. (E) The dotted triangle with 'w' letter represents the wing comprising  $\beta 1-\beta 2$  strands in between  $\alpha 4$  and  $\alpha 5$  helices. Cartoon representation of (F)  $\alpha 4c$  and (G)  $\alpha 4c2$  metal binding sites are shown. (G) The cartoon representation of  $\alpha 4c2$  site shown represents two different models. One model has two metal binding sites (two orange spheres in the  $\alpha 4$  helix and the C-terminal, respectively), and the other model has one metal binding site in the  $\alpha 4$  (orange sphere) and one in the  $\alpha 2$  (white sphere) helices. Cartoon representation of (H)  $\alpha 5$  or  $\alpha 56$ , (I)  $\alpha 5N$ , (J)  $\alpha 5c$  or  $\alpha 53$ , (K)  $\alpha 54$  or  $\alpha 55$  and (L)  $\alpha 57$  metal binding sites are shown. Cartoon representation of two MX group sites (M)  $\alpha 3N-\alpha 5$  and (N)  $\alpha 3-\alpha 5$  are shown. Cartoon representation of (O)  $\alpha 2-\alpha 5$  and (P)  $\alpha 33$  redox-responsive sites are shown. (O-P) Cysteine residues are marked as filled circles. Metal ions are denoted as spheres (purple for As, orange for Cd, grey for Zn, green for Ni, and violet for MAs). Two subunits (a and b) of the protein are indicated in red and blue colors, respectively. N- and C-terminal ends of each subunit are indicated and for each subunit,  $\alpha$ -helices are numbered from 1 to 5. The dotted line represents N- or C-terminal extensions.

**Supplementary Table S1.** The final sequence dataset (3104 sequences) of the ArsR-SmtB family proteins. UniProt IDs of all sequences are mentioned.

|        |        |        |         |        |        |        |        |         |        |        |        |        |
|--------|--------|--------|---------|--------|--------|--------|--------|---------|--------|--------|--------|--------|
| B1X005 | C3HA99 | F4GEA8 | G1WWDD0 | Q6KHJ8 | F9VBV0 | C9P424 | F7XN77 | D5SWJ4  | A6TP79 | C2FX99 | COEHA2 | Q9V2K4 |
| F7YSG6 | D5TZB9 | B7RJ69 | A0ZJ51  | E6U372 | A4YDA4 | F7YSG5 | D1BFA9 | C6WQ00  | E1YF30 | G8QZA6 | A3TK05 | A1U6T8 |
| F2KJ04 | I0GL86 | A1S1J3 | E5WEU8  | D9RAP1 | D7E7U1 | B7VMC1 | F3FIP3 | F6DQ66  | D5NHY3 | Q0JWR4 | G7ZF40 | I0ANJ4 |
| A4YEP0 | F0S2N4 | C5BEF3 | G2RVP2  | A9NG94 | I0FX86 | E8M070 | H0QN88 | Q84FJ1  | D5UHR4 | C8XIV0 | C5BNB8 | A5UTZ6 |
| B4RQF8 | E8T2J1 | B9MEE7 | D5EIW7  | F9VEZ2 | C6D8J2 | A4SFL9 | E1UTK6 | C2EHL8  | C0XR44 | H1ZAZ3 | D0P6F1 | D5UHW1 |
| H2C3B8 | D8GPC6 | F9T2T5 | Q67LU1  | D8GTH9 | C2FD31 | Q2Y8E0 | A7ZA88 | G2HT57  | D5NY17 | E1W0J4 | Q0ZSE0 | A8L456 |
| C3IA11 | E3GM80 | D4F868 | D4ZDA7  | C5USP8 | H0UFG7 | C7CBJ3 | B8H964 | A7GR47  | E8LK40 | E6TPX7 | E7FM99 | D1C9C0 |
| D1GFC0 | B9DX19 | H5XU57 | B9J7U8  | H1Z111 | G0GB89 | G2IU87 | FOJD34 | D7BQ75  | F4LK23 | Q1HW04 | H0JUP2 | D6TY78 |
| B5Y614 | E3GHX4 | C6RMA4 | D0SWJ9  | B1HNN9 | Q12TH0 | B6R8M4 | H0JIH0 | G2HA70  | A4EAP8 | H6WCN2 | A3HX12 | D7CE76 |
| Q4JCP3 | C7WQN2 | H8DV82 | D0S9G2  | C3H313 | Q8TV78 | H0RT56 | A1SN57 | Q6APQ1  | G9WHF2 | D7W8Y1 | A9A2H0 | A3QA62 |
| F2L5A2 | C8PXF7 | H0RP28 | E1SUM6  | C4FKQ5 | F6B9U7 | A3X8H6 | G4T298 | D7EAJ0  | H1LH50 | D6Z0R0 | C2GKA3 | E8N2I0 |
| C9Q8K9 | D0CPE9 | A8FP68 | A3V3W5  | B8GGX6 | D2U960 | A8I769 | E5VXI7 | F8DQJ7  | E1VV77 | Q2RGE1 | A0M3G6 | E3HZB5 |
| O50591 | G4CPQ6 | D0ZBM2 | E6WNM8  | C6A3X2 | B7K1E3 | A3K9Y0 | C3P109 | G4L4Z1  | AOAWV2 | Q31EG1 | G0IVR4 | C0CUL7 |
| D3QOK9 | G4HTW6 | F3BI14 | H4F821  | D3PVI9 | B3PHV7 | Q6NB11 | B8CI76 | F6ITY1  | F5XIN1 | E25FQ1 | I0GHY1 | B1YD51 |
| F4B9Z8 | D3PAR7 | C7RT77 | Q89PF6  | G4HBW3 | F0SUV6 | C9XY16 | E3PW55 | G2SUJ2  | F6CLY3 | C5BXC7 | E4TS88 | B6YU70 |
| C3H9Y6 | F8E9P9 | Q2S577 | F4QZK1  | F6GER6 | G2TMV7 | D1P468 | E8RIN2 | C9Z3W6  | F3YWB1 | A6YFE2 | A0B867 | B4UJW2 |
| B5I3P5 | C0C5G6 | G9Y6F2 | H8NWDD3 | G2FN55 | C7HWH7 | F9Y959 | E0RF12 | F0TAK7  | F5L7G2 | D2S802 | D4M710 | A3WXZ7 |
| H6RQ71 | F1T776 | E8RRE3 | D4XQ33  | B4U802 | D8P7P2 | E4L9G9 | Q24NC4 | H0DZR8  | COZIU2 | H0QW55 | D5P4G0 | A1WW26 |
| B1BYV3 | D6LFT8 | Q5JHK1 | B9JZP4  | B9K9X2 | A1BEU0 | G6Y2U9 | A0Q624 | E1VAH1  | Q2BA29 | H5UKE7 | A7ISD1 | B7K2V8 |
| A6NSR0 | C0EAC5 | Q28468 | B6R5U8  | Q7MS50 | E4TTP7 | B8K8F5 | A8H912 | Q27823  | D3L0L2 | C4F9M3 | A4T4L1 | B4WUQ9 |
| A0NMQ1 | Q82R21 | A3DM14 | A4WB64  | A2U348 | F6CYD3 | Q1AVK8 | G7VT54 | I0WQ32  | G7LXN1 | C9N042 | Q5JGL7 | Q4C7J4 |
| F3QJW7 | Q2CLL3 | G0G7G0 | Q2W366  | A8ULB1 | F7RZ22 | C7Q0A1 | H6CDD0 | H0JXP9  | C6Q2T2 | G7GTJ4 | Q8TVK0 | B1WTM9 |
| COZDK1 | Q30XM4 | D2PL15 | A4SWZ7  | A4ART5 | B9E7D7 | A1WVW6 | Q2IPR9 | F6BHE9  | F3ATR5 | C0F074 | B0TVR0 | Q1QXH2 |
| Q0SUL2 | D3HS97 | D0MDI3 | H8FNL6  | F0S7D5 | P96677 | I0X8Q5 | D7GGR2 | A9BS59  | B0K6I0 | D6KRA8 | D9VR9R | E4TKQ0 |
| I0A2Z7 | F8E7E6 | C5C0D8 | A0KMH6  | Q11UY2 | Q70C61 | Q6L2Y4 | F55HP6 | C6W9V4  | D9T5P9 | A4AH63 | Q88LK1 | B9E2B4 |
| B3EJ89 | D5TBZ8 | D9S0E9 | F8H265  | G8X4F7 | A6FGX2 | O28425 | A4YFH1 | D5DX94  | B1YJ55 | C6WIP7 | G7GY48 | E3GHY7 |
| Q2SPK9 | D5T2M7 | B8GKZ3 | F6ALR8  | A9DUJ1 | C0B3U1 | E7MM62 | G4RAU2 | Q46B03  | C4IEN3 | G8SA54 | A4TJZ4 | H2K0B6 |
| G7WP74 | F9N4R2 | Q970W6 | E6WX96  | Q7UU43 | F6DAB7 | I0QZ50 | A8LTY7 | H1Z209  | Q93GK0 | F5XSS5 | E9SX90 | F4BT61 |
| H4FC51 | A7HL41 | A4FG75 | E6MBT5  | G7HYV0 | C1A684 | C6AY21 | A6E5A6 | E3ZUI5  | E8U6Y2 | F6FR29 | F6FRS0 | H0JXZ2 |
| F2L2Y5 | F9S066 | F4LTY8 | G9PM76  | B1XL54 | Q055K5 | L9U219 | F2RBN0 | H1G8D8  | A9JK83 | H1XY12 | A1RD83 | B8CY49 |
| B1CAV9 | A9D2A3 | D6TGR4 | D3FF85  | G5F2M1 | C7IQY4 | D3Q3D0 | E0DGT8 | E0GNC4  | E5WRZ3 | E8RBJ4 | E3B8R8 | Q97TJ8 |
| Q8TJ48 | C4T7H1 | H3SNP2 | C70Q60  | FORVM8 | H5WWE0 | H2INN2 | H6R8T7 | B0G4X5  | Q18D53 | D3F066 | H5U7X9 | F4CNZ2 |
| G9F1H2 | B5FA56 | A4Y4Q5 | Q8CUZ5  | G4R7V3 | I0DQZ9 | E8LZ15 | E4KRE0 | H0JMF9  | B1GVD1 | Q24NH3 | A0AW31 | A1TA43 |
| F7U7D8 | Q47IG4 | E0UP45 | H2C9A4  | Q2BAV4 | A6WGR2 | Q9NU77 | E2ZAK5 | D5UH63  | QOYT80 | C6J6R7 | F3NCQ5 | D6Z8J9 |
| B5JH11 | H3ZCG6 | E4SM80 | A9F7R4  | H1GEI7 | A8MGV8 | C7ME58 | F5YCO9 | C5C748  | C5USW2 | Q2NHU4 | G9W5Q5 | I0UYA9 |
| E8TPC5 | H0J7C3 | F8DS39 | E6VPT4  | F8WKE9 | B5HBE1 | B7VQ90 | G8ALF9 | Q5KRVS  | A6LTE6 | F5SHQ6 | E9SH48 | H8GFN2 |
| A9KR98 | Q07Z31 | B2V9E0 | G4HHR4  | H2JR52 | D6A5F5 | F9SZW5 | Q1WRN7 | E3BD51  | E8UUG7 | E342C3 | Q1AYF8 | H5XG88 |
| F8E8G7 | Q12KM0 | A6NRL0 | B1ZRA3  | A6CHJ2 | D9UL05 | F5SKU6 | G2LH31 | C3PKW2  | D5XB05 | E7RE26 | C4RDT6 | A5U551 |
| A6LL89 | F9Z914 | F021F7 | F0T6X7  | F6FWA5 | Q2J9G4 | Q1ZU36 | E4IAF2 | E2MWW93 | D8GKU3 | C0BDJ8 | G2P5M7 | A2VMC3 |
| B7IH74 | Q4IAK9 | H7EKW0 | D9Q362  | A4G3L3 | D2B8H2 | C5EYH0 | A3TJZ2 | A4QA71  | H5XUB1 | D8FIY4 | I0UW50 | Q743C4 |
| H6N5C3 | G9AHL9 | E6UA49 | A7GWF6  | G8QM94 | Q5YWG4 | F8C5K7 | H8G8K9 | E6JDQ1  | G9EYV3 | C7IUP6 | G4HQ41 | G8RI86 |
| G2GMU1 | F0LLA5 | D9R5W4 | C0ZG35  | A5ER88 | D7CBJ6 | B8CZQ5 | G9YJ92 | A4AL81  | G0FWC6 | D9RX77 | G7V7Y6 | E6TN78 |
| F6EK80 | F8D7P8 | G0VLQ2 | E6N6A1  | A9CVH4 | E9UNX0 | F0BKL4 | A0QQQ0 | D5NX34  | F5L116 | F4LWA7 | E4RMJ3 | B0MDE5 |
| A1RTY1 | E4Q720 | Q1QQQ4 | F4MMZ7  | A0KG35 | B1VQJ8 | Q8EJ05 | Q6AS13 | C6R4I7  | C6J120 | B9DXC6 | D7CY63 | D3FCA0 |
| D3PAE1 | C9AD09 | Q7VA87 | G2KMN8  | F9ZHP4 | D9WN43 | A0KSK3 | F0Z092 | D1BDR5  | B2UGN4 | G5FI42 | F9DY57 | F4QUW0 |
| D1GF49 | E4SHQ3 | Q30TT5 | F2AFV5  | B0UD58 | F8B0Q2 | A6GQ52 | D4W8X3 | H3MAP1  | Q8XZ61 | D8IAA7 | D6LH84 | F8GGF6 |
| E6PAL7 | F2PE01 | B6BLV4 | E4S8N6  | D4C0I0 | D4YGH6 | G0AQG9 | D7YON3 | E1TC60  | Q0EQX4 | D5USS1 | C6C114 | E3EYW6 |
| G4HTW2 | C7IQE6 | Q1J2T4 | A4XIW2  | A4CXI9 | F1YDW1 | B8HLW0 | C8PYJ0 | E8YM94  | D3RRL5 | A8MGT8 | D5WZ19 | Q8PW08 |
| C8Q0H0 | G0V3W8 | H5XDN5 | H8MV64  | B1IGP0 | Q0W2G2 | Q2JLW1 | A0NXU5 | D3LUI4  | Q5ZQN5 | Q74892 | Q5LUR4 | A9HYK3 |
| C3WG31 | G0EBE0 | C8W0U6 | B8E2I7  | G7GLZ1 | I186U6 | Q2JVC9 | B8EM44 | B1MNS2  | F9UGZ3 | D5AT91 | AGT2K3 | Q46CA3 |
| B9K9E3 | A6TCT0 | H0JX13 | B2A0L2  | C2Y2P2 | D7X043 | A8MKL9 | D7HD60 | D9WLF0  | F4X934 | G8AUS6 | B5HTL5 | H6QAP5 |
| Q9X0Q8 | H3MR51 | D0Z800 | G9ZRG9  | A1RXE5 | Q03I33 | G7M3B5 | F2J555 | H0RC84  | C9LNU7 | D8JT35 | D3RY43 | A7I964 |
| D2Z7S3 | D2ZJ2E | F7UFI3 | A8U719  | H0R211 | A8TBU9 | G9QH44 | B1FDB4 | D7C097  | F4FF52 | A7IFI2 | Q982P0 | Q8P574 |
| F1VXPA | G9Z210 | A4XAC2 | D2B1R3  | Q08UB5 | Q7MQA0 | I0JQZ6 | B1K9F8 | F2RC57  | C5C2B4 | A3ZUV8 | Q1NWZ1 | D3T6F4 |
| C8VV01 | H3M990 | D4LN90 | D5UE53  | G2PIL7 | A7MXW6 | A6TP93 | Q89PH4 | B5HFZ3  | E9RZ71 | F0QV42 | D6TP25 | D4ZYK8 |
| E2SL16 | D2TM56 | G5FI92 | G7W8X5  | G0M491 | F0LR05 | E5WKM2 | D6CPT5 | H1AH73  | G9F1V6 | D1C6H3 | F7K5D0 | B4VKA3 |
| E4LQJ2 | Q8Z4F5 | F2F994 | D9QT17  | F9UMF9 | A6D392 | Q2BBE8 | DCPA8  | H6NSA4  | B9Y3Y0 | A5VCR9 | D7D980 | C9Y5U6 |
| F8CGX4 | H1DCT7 | C4V2P8 | B1I5U5  | A3JQU7 | G2DIH9 | A6CH17 | B4RBL8 | D5P7Y9  | A9A6V5 | E2MYJ1 | AOL7R8 | B0NZB3 |
| C3MTK0 | H3JNR8 | Q8ERA6 | D4IY79  | D3PZH6 | F7QGW8 | Q3ID52 | F7N218 | F8A557  | D4JET4 | Q97B20 | H5XDN7 | A8Y5W4 |
| C7PMV8 | H2JJ84 | H6LB79 | A8GEF2  | C8P5C1 | F2L166 | C6BWS7 | COBW45 | I0RRV1  | E3J9H1 | D9SU05 | D5WQ50 | H1Y201 |
| E6W536 | D4H3P4 | H1XA48 | H3MN27  | G7M3Q6 | Q13E88 | Q0W407 | D6TNB8 | A0QRM9  | D5RUR9 | D3Q5H4 | B4SD98 | Q2J7Z6 |
| Q6NJU6 | G8QYJ0 | D4S6F5 | H5V2T3  | D9T8I5 | D0CW94 | A6URK8 | Q9Y972 | G7CE24  | A4WIF8 | Q8YQD0 | D7DQ17 | Q8ZS91 |
| A5WEJ6 | F8ALA1 | B5JDZ4 | A0YL56  | C0D4J4 | H0BXR0 | G0H1V1 | D3Q3D1 | E6TPY0  | D8P7N2 | B8GAD6 | F9ZQ24 | G2NWD3 |
| A8F788 | C4Z7W5 | D2RP18 | Q6D656  | A4J202 | D4X4R3 | Q5WJT1 | E8N148 | G8RTW1  | Q5NGH4 | Q8TJ36 | C5A3X7 | E8V1X7 |
| B6FUU1 | B0NZG1 | A4CE75 | A8Y5W9  | F6B2Q3 | F5ZBE3 | E4TJ51 | B0SNU2 | A4T7H1  | Q8PYM0 | Q47PM7 | D8JAM5 | G8LU81 |
| C4Z7H5 | F7NNC0 | F2K2P8 | G5JA97  | F6DS24 | Q7W1X3 | B3QYW5 | F4QQG0 | B2HM44  | F7XQC6 | A1RAR0 | H1Z204 | I0PX49 |
| F2JLJ8 | D9QT29 | A7IEB2 | G8LGS2  | E6U986 | A3JWG9 | A7C6F1 | F2NSJ1 | A5U522  | B0U032 | B5GTM7 | B7R0W1 | A1UQ11 |
| E7GB22 | C4RNR7 | Q2KWG6 | Q8GGH7  | F5Y3I7 | C5AHI6 | A4XH75 | D5DK58 | I0RHE1  | E5XD76 | A0JRE2 | D5EK32 | D4J9I8 |
| F5SM82 | G9WQ14 | F6D9Q6 | H8NZP8  | E4T4L9 | E3HP24 | F2K2K1 | H2K791 | E4U5I8  | B5CQD3 | H3ZP29 | O5O2D9 | A1TA25 |
| B9JTQ9 | I0H086 | A1T0P9 | F5RY18  | B5XUH2 | C2LIP8 | A6VWE6 | G0H432 | C7GFJ5  | D4M231 | C9Y5E3 | DSUCL9 | Q76L30 |
| O32242 | C4GAQ5 | G4CGH3 | H8DT86  | A9KJA5 | A8LJ50 | B5YHY4 | A4XAJ1 | A7B0A1  | Q1JEF8 | B5I7Y0 | A4FIC5 | F5SLH6 |
| H0QN79 | I0LA47 | H5TBM2 | E6WGS1  | Q7V6X9 | B6XK84 | H1XTJ8 | F2RDL9 | H1BMM3  | FOEPS2 | G0HMQ9 | H8FWB1 | D8G8M2 |
| E4KWP3 | D2BKP2 | F9ZTR3 | D2RLF3  | C6PZ25 | D0ZEU0 | D8FCR7 | A3X0D5 | G9RY83  | O26985 | Q5WLE4 | D5XB32 | B4W1W1 |
| D3PWI4 | H7F539 | A9IUU2 | D2RNV8  | F6DK47 | CAUAH3 | A0LEW3 | G9XRA7 | G2T232  | G0IWM6 | A1LUI3 | E6TJ81 | D2PPM6 |
| E3HB94 | A9A197 | A8GCZ0 | G2IHM7  | D5DNR9 | B6W8S1 | B7IEG7 | D2U3B0 | B6FV75  | D8JAM6 | B6YU70 | D7BKR9 | Q47I88 |
| F0S0N9 | A6D8Q9 | Q1LKS9 | G2G1C6  | C6BRW3 | C7HUK3 | D5UWU2 | I1A5Y6 | A8RCG2  | F8A409 | Q5YWZ5 | B1MMD7 | F0SRU6 |
| COICG8 | A3TSD8 | B6EMY2 | E8SJG3  | B7GHZ9 | H9UKN5 | A3U398 | D1XWC4 | C8X549  | A1TA24 | AOPT17 | D3PXU9 | Q8FNG5 |
| D5B9L0 | F7P0V2 | D5RJH4 | E4KZJ6  | D6JQ87 | Q2RLC6 | A9B7Y6 | G9EUV6 | C0FSQ4  | C3JSC4 | C7MSS3 | E6SH50 | F3MJU5 |

|        |        |        |        |        |        |        |        |        |         |        |        |        |
|--------|--------|--------|--------|--------|--------|--------|--------|--------|---------|--------|--------|--------|
| B0N8P7 | Q3ZCR1 | D6JPZ7 | H7F362 | G6FVM7 | F1YG20 | I0BFZ1 | G9PRW8 | D3S1U7 | I0RMC8  | B1ZXF1 | F8AA12 | Q5JDW6 |
| C3HZA1 | B5ZYC1 | D0S1J3 | H3N1N4 | F5ZL77 | E6SA77 | H6R2Z4 | A5D4K8 | H9UL80 | Q9X8X8  | Q5YM82 | H5TR96 | B7R48  |
| C5RAM6 | F3ZY73 | Q6D0L8 | Q3ELP7 | F1YG22 | Q1G6U7 | C1AU11 | H814F7 | E8PKL8 | E4WCDD7 | F0LM33 | C7QDQ0 | B7KB27 |
| C7XX99 | Q9KEA8 | Q5QW13 | C2QKV3 | D0S363 | A1SKU4 | A0R0S0 | E0R5V0 | F6B3Z9 | G5JAE0  | G0J0E6 | G2GB56 | C8W5S9 |
| Q9KI48 | G8S699 | E5BE12 | G7GA79 | F51814 | H3SF27 | E0QIS7 | D5CDS3 | F7KR32 | D9TSX9  | D5BUU6 | D7W9Q3 | D2QV67 |
| E7R043 | D4GVR8 | F2G541 | D8IAW8 | F8DH55 | D5NY58 | C8NF12 | P74986 | E4LSQ2 | D9RZR8  | E2LP73 | G2PE84 | C7M1C2 |
| G7VH00 | D4GVV2 | A7HTK5 | D0SQ39 | D3PUY5 | A8M8X6 | Q03ZA7 | F4V7J1 | G8LWB1 | A9A5P6  | D6XY52 | Q8NM04 | D0MIH1 |
| D8J3C9 | C6HXG1 | A4BBY6 | D4XMP3 | H2J2N3 | Q5YV57 | A4FL82 | E3PM92 | E2SGW2 | E1VZS9  | Q1AV49 | I0REX6 | H6RPZ1 |
| G0HTB9 | G0JQF8 | H0TRB5 | A8UZ97 | A6QA25 | Q0RV07 | F9W1R5 | H2J991 | E3PW79 | E7NCZ4  | A1RD96 | A8F6V6 | O57801 |
| C7P0D1 | C2PGY2 | C6RM09 | F7V4I9 | F5LFL5 | C5F8A7 | D0WU28 | Q5FMZ6 | G5FE59 | E1QYL4  | A0AW45 | C0ZBD3 | H2CEJ9 |
| D4GTN0 | C6WB18 | E3I670 | F8WK82 | C2TMP8 | G0IY78 | F3KH79 | C0WYD0 | D7CLJ4 | Q2EYX9  | D0L7Y5 | H5SV04 | F5XHC6 |
| E7QPW1 | Q4J7Y8 | F0S458 | H3SKG8 | H1ZF54 | I0L4J5 | A8FQR3 | C1D2M6 | F3BCI7 | A5N3M1  | A8S9K0 | F9DY04 | A1TBG0 |
| HOHEE2 | C2VES3 | H2J5R5 | E3H787 | D7VTM3 | E0NG13 | C4UIH5 | C5BIL3 | C0C481 | E4KZB7  | D4CPW1 | F0RPI3 | B8FLL3 |
| D1AVJ4 | B0SSJ3 | B1C8D3 | E8U312 | G2PN52 | A3IF52 | B7WWW6 | F5ZAG7 | E0RUZ8 | C8W806  | C2JTI6 | Q24P53 | G7URV6 |
| F0H1T5 | C3PHT9 | C2CN51 | D2J5V2 | H1ZA38 | C2JZV3 | Q0FI52 | F6D7P4 | C4Z1R4 | F9MV68  | F9HLN2 | B7JYR8 | G0HLN1 |
| E4NMP8 | F0PLT3 | Q076F0 | G5K4V4 | D7W5M2 | H6L754 | D6V125 | E3DQ89 | Q0AV75 | B5HAT8  | C7MLA4 | D3LL25 | C2VWL6 |
| C3I9P8 | E4RYN2 | F6BC31 | C1D3X8 | G8R7S6 | E8YSX0 | D0J7R0 | A3Y4W8 | G5GIP9 | H0QN11  | G8QY10 | Q212C4 | Q46W66 |
| E4RNQ3 | D8HAK9 | Q04PN2 | F8WQU1 | A5FFL5 | D3PUZ7 | A3UEV6 | F3NDW1 | F4A006 | Q9K5Q1  | COVHC1 | E2CQ24 | D3EQW3 |
| I0R230 | Q7ZRX1 | E1QRP3 | C4WDF6 | D7W025 | COZK16 | G7M5G3 | E9UZL0 | Q3AD54 | E6TTD7  | A0K1N2 | A3SZH7 | E3J9N7 |
| D5VUC6 | D2ZQ55 | B5UJY3 | Q0ZKJ9 | G0LK97 | E6H7E6 | D1BPW7 | D9PXD4 | C8VX22 | P30339  | D6TIN5 | Q3B575 | A4U004 |
| D4W829 | D0KRQ1 | I0L9Q3 | E5CJF8 | D5BF42 | C9R9P0 | G4L7Z0 | Q9L1V5 | C7LTU1 | E6TZM5  | F0M231 | B4S6P9 | A5FBK2 |
| C5CEM1 | A6YFU4 | F0F238 | H8H3B8 | H1H9E7 | C7BK48 | C2X4R9 | I0PX75 | B5CNL3 | C6LC78  | A0AWY5 | Q8KEP0 | A4T1V9 |
| E4SMZ5 | H9UB13 | G7H1D6 | C3XL10 | G8R8G0 | B4U0G0 | G4HJR1 | D3FH85 | G8AP28 | Q24P50  | B9MG31 | D1Y7Q9 | F8A426 |
| B4WAC9 | D9TH82 | F8JV56 | I0BDD4 | C2FXM2 | F7PJG8 | D6Z428 | I1D561 | Q1YUF1 | B0G8B7  | Q8Z6Y1 | Q0S966 | G8RJH4 |
| D4DU70 | A7IMC2 | C2PXX9 | D7WV37 | A9A2M9 | C7NMG1 | F0LFS1 | B1MME4 | B9QW54 | B3EMA2  | Q9R283 | D7A6T2 | F1T3X4 |
| A4YGR4 | E6XK74 | A7ISC3 | D7WNF8 | B7DXT7 | E8RI68 | A3DP26 | I0PX88 | Q2RR33 | E1RL24  | F7KDE4 | A4TAQ3 | G2FXW7 |
| B1YBJ8 | Q9KI49 | Q7Z2Z5 | F2F0R7 | H0R275 | A0ZIS3 | D3AE47 | G3ISL1 | B1ZCL9 | D3G0Y7  | D1B163 | B2IEG7 | COB8N3 |
| H2C7C9 | C7RFZ0 | COQTY4 | D0WJH7 | E8N9W5 | Q31QE9 | H5STY6 | G2G6J5 | B0SWH1 | E6SJI0  | E6TV20 | Q0BTU0 | Q16A53 |
| G2FKA0 | Q0GL18 | B4U846 | C9AT27 | G4I0W7 | B8HV12 | H0HP07 | G7ENT0 | G2IJH8 | F3APP0  | F0SX40 | H1PJ79 | D5VQC2 |
| C2VKG7 | Q8ETD6 | I0H401 | D5HUU6 | C1BD14 | Q6ZEU5 | D7GH05 | E6VW45 | G6Y7V7 | D7BFG1  | C1C2Z8 | B6G269 | F4CQD2 |
| F6D594 | C8PP27 | B3E731 | F7R1V7 | I0WQD9 | H1D098 | H0RMA9 | D6SSP3 | C7NGD0 | B3EE97  | I0GTZ4 | B5EF53 | F7VCD4 |
| COEQJ9 | A7B162 | G8SGL1 | C9RNE6 | A1TC14 | D9STV3 | A6LZ56 | D4E4P3 | G4HTW4 | B1B813  | A3DC05 | Q1R826 | E0SS10 |
| F0TBJ7 | E6VXR5 | Q07KE1 | D9RP35 | C1B401 | F6CME5 | H7B869 | D24PV7 | E4HP42 | G2TI48  | E4I3I2 | I0WHH0 | D2RD66 |
| B9WUM9 | H1D0I9 | Q0AT86 | E6LFB7 | E7ND71 | Q3A8I2 | D7D910 | H3MV44 | A6UNL5 | E5WQM6  | Q7M982 | G9EY32 | B5EAZ8 |
| H6LC74 | B9L857 | P73808 | F8HZ81 | A6LME6 | Q3ZXW8 | D9PYU0 | G2E4S4 | C2EGK3 | A6CPB0  | F6D6P7 | F2NHV3 | Q0K5U0 |
| G7WF30 | D6GVA3 | G6FVM6 | G8PAQ6 | E5CKE2 | F8AA10 | A9PK72 | D4GEF6 | A5G6P8 | D4RZ68  | H2J5M9 | Q1NWX1 | Q70K54 |
| Q96YL3 | F6EPJ9 | Q01256 | A6C064 | D6Y5G0 | C6J2E4 | F9S0D8 | E0LTN0 | Q1YW14 | F4XFA6  | E6U7U6 | Q1ARZ0 | F4BT69 |
| E7GUF5 | D9T9G2 | F0G9Y9 | Q0G015 | G2KV87 | D5XB12 | C9QH9E | D4H288 | F0S2A1 | F1TF91  | E4Q8N8 | E9UVL8 | F4LSL9 |
| B4VZ23 | A8QY78 | D9QT26 | Q1LBE1 | C2EUW0 | F4AAT2 | COETC5 | B8GSZ1 | C3BJG5 | Q97GX3  | D9HTZ5 | A1SIT1 | A3TII6 |
| A4WSE0 | G0GB32 | Q49UN9 | Q1N631 | B1HS49 | C7Q9D5 | A5D4T9 | A1S2U7 | D2C828 | H3NE72  | G6JZD8 | F2NBL2 | C7MQB6 |
| H1KYW9 | C7RE18 | G5FA53 | Q7P1X8 | E0NJ96 | Q8XYV6 | E6W701 | A3XH18 | A6TP08 | C5VR61  | C2YLV4 | E1L235 | D6U1U0 |
| D1AIZ7 | E0RT95 | F4NA82 | G6ELH1 | E3C538 | B9L293 | F4BT38 | Q11XN9 | C7R1S3 | A1BE14  | Q1AYG2 | Q13VA3 | Q8PZ32 |
| B0VEX4 | B7IDA8 | Q49UG9 | Q13051 | A8FE47 | F0M1L2 | C8W3U4 | A8LVT7 | B2A7P2 | F3A8H2  | Q17FU5 | C3JNV4 | A0YQ22 |
| D0I812 | E3CL76 | Q8GQH1 | C1DA25 | F7UFK8 | A3Z846 | Q0A534 | F8K3G9 | A7HN46 | H0UD07  | Q0W191 | Q1B7M8 | A0AW47 |
| Q1GL25 | G0VNC3 | E6TX32 | C9P6Z8 | B6EN85 | A3YXT3 | F1Z6H8 | D5P296 | A6S5V0 | D4JHS5  | F8A3J9 | B7KK76 | B4WBX9 |
| E31IU2 | C2CHA1 | C2W9L3 | B8GR99 | C4SGF5 | D9S043 | Q2G922 | Q7K092 | Q2JTV9 | D3VN2D  | E1JQ90 | H8I9Y8 | F9NSY5 |
| B6FSP1 | C2BGP9 | COZEV5 | C6WUX0 | D0KX41 | G7W8Y2 | B4WUP7 | H5XBE2 | D4M3R7 | E5WPK1  | Q2IRU5 | I0RKP2 | A9WLP3 |
| B5JTH5 | F0GXU3 | D1A229 | A4U485 | Q3SGA2 | E8WRE1 | A6S388 | A4X519 | C1IUR7 | G8NSR2  | Q07M15 | E2CPP3 | D4HE37 |
| Q0C1Q8 | H1WQF3 | B8YJ8  | Q2IS21 | C4ZPA6 | D4H6Q7 | E1IIR7 | A1UKT9 | C4U3V6 | F4MSS0  | H4F562 | B3QMB4 | COXR2P |
| G9XEY0 | D8MHG5 | G2HSM4 | E6VE74 | H0PXZ6 | Q24ND0 | E1SNA3 | B0VH14 | G5F919 | D9STV5  | D8JT17 | A4FA9  | Q1X1K3 |
| A6UVE7 | E6TWH1 | F8EZJ6 | Q89I66 | C5D131 | F5L7P2 | F6ADP2 | B1C085 | E3IU02 | A8MG77  | D3P408 | A9KR37 | B4TVG5 |
| GOEDB2 | Q1G9R8 | I0GN22 | A1BB68 | D2BS26 | F6EQX0 | F0EDP1 | E6UCJ1 | D1BRT1 | D2BCR3  | A2SJD4 | B3QS52 | I0A1I0 |
| F0TBG2 | F5RG63 | E2SP42 | H0BSJ7 | Q2NBE3 | Q7HBF6 | Q4KEP0 | F7WQJ1 | D6A8B6 | A8MIR7  | D5RJE5 | B2T655 | D0LPK6 |
| F4B596 | Q3IUN1 | C8VZK6 | Q31PQ1 | C6CQF5 | B0U0U1 | Q1I8G8 | E9S4C5 | B4V0H5 | A6TJK0  | G8NUB0 | E8R2Y7 | F3NQD0 |
| E8R2P4 | D5CNE7 | C6RNL0 | C4W826 | F4MU41 | D1AM39 | Q3KDL3 | A1W5R3 | D0MFW3 | C6D253  | H2GVU1 | F5UBW8 | F8A723 |
| CSUTA4 | D6Z6D7 | COQQW2 | I0XRK7 | H5X7F6 | A6TV63 | G8PF82 | D9WGV3 | C7N045 | C6CVU6  | C3MXN1 | E5VM25 | Q9CCG5 |
| G7WAX7 | E6RKW4 | H1BBE6 | D5AVK0 | D4CC10 | D1AH03 | E3ZU08 | E0IAW2 | H5XMZ2 | E0RE61  | E0Q5K9 | D8G739 | C3JKW9 |
| D2RE71 | F4AQX2 | A5KJX2 | F4CWW9 | B9NLL1 | Q2LXJ9 | C9A1P1 | D3PUV8 | H5TT32 | F9UCB5  | D9ROX3 | D8K2Q5 | F7S2V4 |
| A8MDA1 | COEGN1 | F3ZS0  | D8J9C8 | A4YI58 | E3BLJ5 | D5WR46 | A0R3A8 | H0JMQ3 | B3QZ35  | C9R9T8 | F8K109 | A3SQY3 |
| C6SBZ6 | F7RW16 | E0I5R8 | C6WE17 | H4F028 | B0JM62 | D5XB18 | COB005 | D7WMD9 | G4Q2N6  | C7M055 | A5USM5 | Q13BW9 |
| G4RPN4 | Q604K4 | E6L3E9 | I0K766 | G6CFH6 | D2R962 | F9DWT8 | Q2RGE8 | E6FR16 | C1B0P3  | A8MGX3 | F1YPQ1 | Q8GCH3 |
| B9LP09 | D9SIY2 | F5SHN6 | F8DQV2 | H8MJ51 | H2J9U2 | E6TU99 | G5FA58 | F7SLL2 | F9EFF3  | B0MBR3 | D6B9N8 | C7P4A4 |
| D0W318 | A4YSX3 | Q7U826 | B1HZ11 | C2SK16 | G6FU51 | Q7MSS8 | F0QBV3 | H0J4W6 | C6XMM7  | C1F4T5 | D2SSL2 | Q6XN12 |
| E0NK0  | F8F2S1 | E4RJH6 | C5S0J8 | E6N4K5 | D9VGM9 | D5DNR8 | A6FWC0 | H8G8J4 | D6E980  | E8T339 | E8W3E2 | C1BD12 |
| F2BY03 | F9CYW9 | D1B373 | A7HWJ6 | Q0S8N8 | A0R3U9 | G8N5R8 | B2Q2D1 | D9V8M0 | B1CAP9  | E6J4S4 | F7YV25 | B9KZL4 |
| B9ML15 | I0XM55 | C4XMA2 | C3N683 | Q9A8S1 | Q6AFV1 | Q5KUX7 | I1B0R9 | D4ZYS4 | F4LKE5  | H6RJ31 | HOJYA7 | A6WGU7 |
| H1BLZ3 | A6CTS4 | F3MAW8 | I0ILJ4 | I0XP11 | A8M9B3 | C2MJP5 | Q121S1 | A9BF18 | D4YLE2  | G8S4R4 | H6RQX1 | F5XIK3 |
| A1TB75 | Q8PSA9 | F4LL50 | H0HEK7 | E4TIP7 | D7AX99 | Q6SIV2 | A9D969 | H6RUX4 | Q98HM2  | E8PSA1 | D4YPR7 | Q73Y20 |
| Q2W0X8 | H0S6Q3 | E4RM18 | A7GU52 | D5VG11 | D2MN29 | D3S2H5 | D8MJA8 | E1IIA4 | A1XKI7  | F2KJ02 | B7CCD6 | G9X220 |
| H1RYZ4 | Q2BDF5 | Q49WV1 | Q81LG5 | F4FZB3 | E7GDF4 | H8E678 | F9W8B7 | H5UJJ6 | D1Y295  | F4CVA5 | Q8DK52 | D3FBF8 |
| D9R3P2 | F3KL84 | D7V0Z9 | D5P9A4 | B2G3I4 | E7MPG9 | F4AQJ8 | A3TK18 | H5TMH0 | B0ABQ3  | H8H395 | A4T2B3 | D7GIV0 |
| E6WNCO | B0C184 | F7V3D0 | B2GE55 | D2EH66 | D4KH27 | D9PU51 | D3EIT5 | B8FCY2 | D5Q711  | F4COY9 | B2HLA8 | E6TIV9 |
| D7N3E5 | F2IG25 | H8E7G2 | H3SLV4 | D5BYQ4 | I0JHG3 | A4B143 | D3Q6W3 | H5TT26 | B8DQV4  | F4CXK1 | AV7C32 | G7WAV4 |
| I0KGA1 | C2V4J3 | G2IWL8 | G9EGW4 | H2CDI2 | E8LD44 | F5XPB7 | Q1M329 | D3LQ26 | A4G4C7  | F5XPD3 | E8W4T0 | A1RD94 |
| D5V5E2 | C7XS7  | D4VYE7 | H1XS35 | D2S6R8 | Q03TP8 | Q4L3Z4 | C9AN19 | F4G373 | A7HDJ7  | G2GAZ1 | H6RBJ3 | F0BUR8 |
| D3S2H1 | A8M9G5 | A6X3X9 | G8S147 | G8PBW4 | D4YPB2 | D0I9T5 | E4NQAO | F4CKS1 | D1PQL7  | F2RBN3 | G4CZA0 | Q0AD51 |
| F0T8U0 | E4NQF2 | C9NM68 | D1AM35 | A3VFN4 | I0RGH8 | D8BF87 | G5HTG7 | F2J3R5 | D6AGZ3  | F3ZB83 | B0MQ49 | Q2J1A0 |
| F4LJ55 | G2RR55 | B7A685 | D7EA22 | Q3A257 | H8E859 | A1RDA8 | ABRIW2 | D3PV01 | A8MGW4  | H7FVV4 | Q3ME36 | B9LN99 |
| B3EHI5 | I0WC45 | E5V4X6 | B8H6Q3 | C7LXF4 | C3X3Y1 | G4NW87 | H2K539 | D3LQ22 | A4CH00  | G7CE22 | B1C9F7 | F0SUJ2 |
| I0A2V7 | A9A1X7 | C2H728 | G6PQB7 | F7X5H5 | E3G5F5 | F7RNM4 | B9L4W7 | A1TBQ0 | B8G3P9  | D6AAL8 | F4XNK8 | C7NGD5 |
| E8T4H9 | E3DQC1 | H2A5B6 | H6R3Q6 | F2L083 | B6B6I7 | F7KS50 | C7H162 | D9V7Q0 | G2PPK5  | G2NJU9 | F5SN48 | E6TPT9 |
| F3Z0D3 | A4FEQ5 | E8JM63 | B8G158 | A7H7K3 | B7KQV3 | Q2SDC4 | Q72LY5 | Q8YLY7 | F3YWK1  | A8LUZ0 | D5V5S9 | F8I2A5 |

|        |        |        |        |        |        |        |         |         |        |        |        |        |
|--------|--------|--------|--------|--------|--------|--------|---------|---------|--------|--------|--------|--------|
| F6BH71 | F4BPK5 | H6P9D3 | A1HQT0 | F6ISU1 | D3RQM8 | A4Y4R5 | C5EMB4  | B5W1Q0  | A0QRM7 | G0TQP3 | D3AF57 | Q8FUK9 |
| D7DQK8 | D7BKR4 | A4IMT2 | D4ZTC0 | A8V3F8 | G6YIT4 | H0DJO2 | E8TPL8  | Q0BV80  | G8RI89 | D5ECC8 | Q3SU85 | Q6XN55 |
| Q8XM53 | Q2RGF5 | F9DU33 | D7E2J7 | B4S7Y4 | F9UDM3 | D5NVN6 | Q2JZ70  | Q8CNH3  | F5YTY4 | Q7V1Y1 | A6CAK1 | H6MTR2 |
| Q9CKX0 | Q486N6 | E7NOD1 | A6LV95 | B6R2V7 | F7SYP2 | G7Q5F5 | H0DZR1  | A4AL19  | E4RJN3 | D7CIH9 | D9QLW6 | B3QGY1 |
| F0F970 | G6VNS6 | Q03RL8 | G7MCW8 | A1XP68 | Q0KA89 | A0LNR1 | E3I460  | D8FJF9  | D0L824 | C4UJN3 | Q98BA0 | A9HA00 |
| F4A148 | A8F6N1 | H3NQK2 | A7GBE5 | Q3AD40 | Q47E67 | E1SUE1 | I0PX81  | C7M977  | C7QQA0 | G2GN51 | B8E1X7 | B6W8V8 |
| C2E4H6 | Q58IT8 | G8RZJ8 | F1YZ80 | Q2RRY7 | Q3KAK7 | A6FBU5 | B1Y5V6  | H5TXN5  | F4H4G1 | D6Y4B8 | G8SBF6 | H0E4D2 |
| D5GZP2 | E4N758 | H0R3E1 | D9R5R1 | E0U733 | B5WK14 | C7LUA4 | Q68GK3  | H0JY99  | A0M0F8 | E1QS58 | A5ZR55 | E0DGE6 |
| D3PCE3 | A8RAK5 | A5EIO5 | C0GD92 | C6CL55 | B5IM69 | Q8ENQ3 | Q06820  | H5UGI8  | A3XLG7 | A4AL16 | D6CVH1 | D5DC83 |
| H5T471 | C6Q2J2 | C6XE53 | A5HZU6 | B7KE36 | D9Y332 | E8RI65 | F4DY75  | H5TW59  | E4SAZ7 | G2G5T0 | A2SRN2 | D6LT72 |
| D8GPC3 | A6Q3G0 | A3W525 | A6LUK1 | A6NU63 | B1YG07 | F9XXI8 | Q46F54  | Q9ZBF4  | A0M104 | Q6XN15 | F8AJG6 | I0H1B6 |
| F0TBG9 | A8M0U9 | G2DMG4 | D3FW73 | C0WAG3 | O27487 | A5YVA2 | H7EZQ1  | Q5YV39  | D6Y4A9 | H8G9B7 | C2HZR7 | E8N375 |
| G9QFW8 | A8SXB3 | G3IQY2 | H0UHY2 | A5GL52 | A6TP89 | D6S5J1 | B1JFN8  | B1VPT7  | D9TFP8 | H0RAX7 | E7QUM9 | F8B1N6 |
| B3ZYR7 | Q5WC17 | Q8KZ33 | E0UUX1 | Q9HJ62 | F4B706 | B1KJG7 | H5XXJ0  | G4I2I0  | B8CM10 | G7H4L4 | A8KXB9 | G1UWN6 |
| E3BLP8 | B9DMA8 | E8LSM4 | E8LFQ5 | Q1AS38 | E8T590 | D4ZE09 | E6SD02  | D0GKF6  | G8TTU6 | B2JEY3 | Q8TZE4 | C0BAC4 |
| G6YDT6 | D3EKJ9 | H8GKA3 | D5P3B3 | Q2FD42 | G9ZR45 | C2Z2H3 | H2BUQ9  | A5ZMCO  | D6TS35 | E2ZHD2 | B9E472 | G8NXN1 |
| Q8ZZ86 | B7GKP7 | F4NIT3 | D5U3P3 | H8I4W5 | E0I4N5 | E6X106 | E2XRQ3  | E3GIH8  | H5XEE1 | F7V1J9 | G8M095 | Q47PL5 |
| B9JBY3 | E5WQL4 | A4XP40 | C6RRC9 | D1YWD7 | H0IV71 | E7RD60 | C1DJK2  | A4XG06  | E6TPX2 | D1Y2Q8 | H8YKT6 | H8E9H5 |
| E1UU3E | G8S4V2 | G2KRY7 | H5Y2J0 | D0SW30 | Q03P99 | Q46BU5 | C7Q095  | G8N8H8  | B9KZQ9 | D6TST9 | H8Z375 | B4WUN0 |
| F6D6X4 | C1DA84 | G4SYD5 | F5I755 | Q24W52 | G6YDD0 | A3Q9Z1 | A5UMA3  | G4KQ6E  | A3TYJ4 | A0NH57 | H6RWX1 | A4FKV2 |
| Q5LK84 | H1G0G5 | F6CZC3 | G7W8Y9 | A3WN61 | F6D293 | B5I6E7 | B7S248  | B4S5C9  | C7N3R0 | H0KB99 | Q4J865 | D2EF69 |
| Q57682 | B8KK49 | B0TJA5 | C1A7V1 | Q2I4E3 | F4GD99 | B5I9N2 | D2PQ16  | C6J9H1  | D1PP09 | I1D0V4 | I0H695 | D5QGL9 |
| F6D3H7 | A7MXK4 | F7YNX5 | Q46KP0 | F8E9Q0 | T1H40  | F4B6Y3 | H8IU02  | A6P0A4  | F9VPL0 | E8SGJ1 | C7NHYS | D5U235 |
| C9RDU5 | A9DRB5 | A4Q808 | G1V619 | G7WP58 | F4FWM0 | A9VF49 | B1MMCA4 | H7CZ09  | C7NDS2 | C3WSJ6 | I1D4J4 | C4S257 |
| F0T8G7 | A4A7K9 | B1L436 | F3ALF3 | A4CVC7 | C3MIL0 | F6FW97 | Q3A848  | Q7Z7R7  | F4CYQ8 | E3DMI9 | D6E6V8 | F6ERT6 |
| D3DFU1 | B0TXV7 | D3EFQ0 | D4TFE1 | A9DNR4 | E6S9T2 | E2SE47 | G7G5H8  | C4L2F1  | F4GLG8 | C9K194 | B6GE45 | D1BG40 |
| A1TA18 | A3Q8U9 | Q469V6 | E4TXK8 | A1HUC1 | G7ZA59 | C3N321 | E6RQN0  | F7YYQ7  | C8PMD4 | F9DTU2 | H5TTU3 | B0JM43 |
| A6UV22 | F4QTE9 | G5I9X1 | F3MAW5 | A6ET09 | E4KN11 | Q47M18 | B7SKG9  | C0CI95  | A8ZL51 | C8WVN6 | A9B0J4 | A3DKH1 |
| A8M9V9 | A8SW86 | E1RDF2 | H8XU33 | E6X9H2 | F4CK97 | E2NSB1 | Q9EUU5  | F1TE71  | B1G2L9 | H8YZF6 | I0RVC6 | A5W4V2 |
| D9TSX4 | D9UWM4 | C2Y3Z8 | A6GZV9 | E8MXM9 | F9MTT5 | A6FCH5 | E1R6K9  | C6JFS1  | B9CL93 | C7M2N3 | D9Q498 | Q8PUT9 |
| A9A9M1 | Q6L1W0 | C3FV37 | D2EFM7 | F6GBY4 | Q0W7Z6 | D5R8S2 | E2S694  | B9E869  | E6MIE4 | H8KTJ9 | H8IQ72 | A1T2F1 |
| D2JC95 | F4Y282 | Q0Z7E6 | F9VCH5 | Q26H69 | G8PAX5 | C7R057 | D1C3J3  | Q314U8  | G4T1C9 | F5LFX5 | A2VGC7 | C7MB55 |
| C2GK70 | Q9YF88 | E3DV87 | A6CKU4 | F0RFY8 | F2Z432 | A3N400 | Q7MCM3  | D6XWM8  | D2S4W1 | E7GBH9 | G0XCE6 | H0G8Q1 |
| C2EPO0 | B5UYW5 | A7Z1D6 | H0IQL1 | F4AYP2 | D0D4P8 | F9DY38 | I0IA13  | A1HUB0  | G7CIH0 | E1QXP0 | B7ASA4 | B4WC40 |
| C0VYB1 | E1YJ72 | C4FIS2 | G4D4P7 | H7FVV9 | Q0FXC9 | A1RDA6 | B8G166  | A9NHM8  | E4NIS9 | C5E7X5 | Q5S940 | F5SIH1 |
| H8E8T4 | B5IQ09 | C1DXK7 | D8MHY7 | G0J119 | A6Q8D5 | F3NQ68 | D5P4G3  | C0GI40  | E3B9B0 | E2CP83 | G5IDP7 | Q6AQ20 |
| Q1NUN9 | H1Z2T6 | E8T4E5 | G4EV27 | F2IJY4 | F5UIZ8 | C6D099 | A2VJA6  | Q12UN1  | A4AKQ4 | D9SPH8 | E5WQI9 | D3R0Q4 |
| F8GBT7 | G8TJU2 | D9QVF4 | E9RYX4 | Q7NPQ3 | G8M128 | F0LHX7 | I0V8D8  | F6DKN4  | B2HH01 | D6Y3P6 | F0T6W0 | C1BD59 |
| Q1Q908 | F4BA10 | E0DC63 | A5GR23 | D0MF84 | Q7CKC2 | Q4GEY1 | H2C1S3  | A4J4Q4  | Q8ETI4 | C7NYS3 | C0R0B4 | Q8VML1 |
| F5YPZ5 | A1RYF7 | E0U2G1 | G1UTW6 | I0I4H0 | E6U3W0 | Q8T1I3 | E9UVN2  | D0CYI6  | F8F350 | F4L7N7 | F8BVW5 | F4LS23 |
| D4W3K5 | B9DIE6 | E8WN99 | B6WXY3 | F4GZB5 | Q0AYF3 | F4HJT4 | FSY277  | I1DUX3  | H7GG38 | G8RMV4 | B3EHR3 | E5Y8S7 |
| O29604 | E6LDB2 | A4FK14 | A7NAY9 | Q8FLG0 | B4S7W1 | D5E837 | D9UW00  | D5VF12  | Q5L1Z6 | A1TA38 | I0A034 | D9UQ96 |
| F0T9S4 | C2Q5T7 | A5GCN6 | B9MHG8 | G7H576 | B6EM94 | F8AJA2 | F3MNR1  | B8HUS8  | F5YP55 | A1UC24 | A1SOB6 | A7HGH8 |
| E0MZB3 | C2Z7U7 | A5PCL7 | C5B5S7 | B6W742 | C7RBY0 | Q8PY24 | A5Z5U3  | A0LBW7  | F7J514 | I0L2L7 | D0L844 | A1RCV0 |
| Q30267 | C6W7Q8 | D2ZAA4 | F3KCI7 | G6FQ76 | E2SBV7 | H3ZM70 | B9MG21  | A8TRC0  | Q8KE78 | D9T082 | A3MTF6 | B2HN90 |
| B9LWR3 | A2CDU1 | B1XPW9 | A6FPQ9 | H0A789 | Q8PUU2 | B0TA75 | H5TWY2  | C9LYU2  | B8DOP6 | A5D5O8 | D2R1C2 | D3CRX1 |
| E256I0 | A8CTC2 | C6JQW6 | A4SQ15 | Q38YK0 | F2GD97 | D8A0T7 | D7N823  | A1RCC0  | G8QWI2 | D5UE52 | D5E6K8 | D3R0R0 |
| C2Q2Y3 | G8S5J2 | C4L6C6 | G9A790 | H1AKZ9 | D5EAJ6 | Q9Z2B9 | H1LW73  | H5XOM4  | A6B3J1 | D5UH98 | F8A3K8 | D1ACS3 |
| D7N913 | A3Z6L4 | D2J731 | D0S8L9 | C5ZVB5 | Q4LAB6 | A4ENM3 | B3QFR2  | E3GLB8  | D7WXP9 | C5BXM7 | G0Q086 | A7JIE0 |
| Q8KBX8 | B6G272 | G7ZPG3 | Q0BZG7 | G65IM9 | D2B1R0 | A3WJA1 | F0SH46  | F2L6E5  | Q72KG0 | Q1J3B6 | F4HL10 | G7Z2R0 |
| F8ANI1 | F5YCA9 | Q5HR12 | G0HMP2 | E1UV78 | B9M9J5 | D6V9F2 | A3Z515  | D7BR57  | B6G2A8 | B1MME5 | A3TRP7 | G5FIG5 |
| F8JP62 | E3HCD4 | Q4LAB3 | H3NGV8 | F8KDK5 | B2A001 | F9QDM2 | F2NKW7  | Q7Z2Z8  | H9ZSD1 | G2G9U3 | D9W8V2 | A8KZ20 |
| C0QIC7 | B4UHR8 | A6TLY0 | A1AQC0 | G4I113 | D3P8T9 | C5D8Z8 | Q9V061  | B0CB29  | D1YYC1 | E3B863 | F0D842 | F6D4L2 |
| D5AVK5 | D3DK69 | F4FXT8 | A8TKF7 | F8GKN1 | Q39YA9 | Q8ZKP1 | D4J0W0  | B9DJ16  | F8FDI6 | A1AMC2 | E5CIP5 | B8J090 |
| G2FN66 | Q9K8L0 | B9E7M3 | H8IKQ2 | Q0AT54 | Q748P9 | I0KYR8 | C1A7Z3  | F7UHK1  | F4FXR3 | B5EK86 | Q4ZWB8 | Q8PUT5 |
| B7GF65 | F2RBN7 | P45949 | C4L214 | C8N7V7 | B9XS30 | C2PDK6 | F7NIX9  | B5I456  | A0R802 | A6W5A1 | C5ASH6 | B4WTL5 |
| E4TF07 | O6Z394 | B4X1H5 | A1UIY4 | H8FSR9 | F8G8T2 | D9WEW6 | F0SUY1  | E4RMMX1 | Q8ZR27 | H1Z1W2 | Q6SKA1 | O58828 |
| F0GTH1 | G3GC81 | C4IGI7 | F0SHF8 | Q0F968 | A5GCL2 | C4RLZ6 | F1TBW1  | F4CXD0  | Q0G1I3 | A1TB89 | F1YGL1 | Q0RKE6 |
| G4L907 | E3PWS8 | D3APB4 | D2ZYNA | A6U9X0 | B3E6Q1 | Q28UY3 | E7RK22  | Q2JKB0  | Q212C1 | F4CVQ3 | F0HN83 | A2SRN6 |
| H6RD88 | B8HZS4 | F5X137 | G4Q775 | G2DVJ0 | E4T5F0 | D9T9R8 | E6VU65  | E7NVR8  | Q9A4H0 | D0LEW7 | G8RKQ7 | F5XIL8 |
| G5J531 | G4KU60 | F0SUS4 | Q1QW69 | Q8RK00 | E6J5U9 | C4WFK6 | F2JJ26  | G1WQA1  | Q1IKY6 | E6S8J7 | H8IT10 | G2GDQ6 |
| B1WQ14 | A8SDF9 | H2J993 | F9USR6 | F3L399 | D5NY11 | D1FA97 | A7VW86  | C7UHPO  | E1VT73 | E2SE5D | A0AW51 | Q2S6B6 |
| B6AX86 | C6LD57 | Q0VL20 | O53478 | A3VJR7 | H0QN72 | B2J709 | H2J987  | C7WQNO  | Q9HI03 | D5XFN0 | C6WRG2 | H5X6G0 |
| Q47E55 | D5V235 | A6TML9 | A1TGH2 | D8IV76 | F9VNU6 | C6E9I5 | F0JHX5  | C6PRG9  | A4QFY6 | G8RJ93 | E9UV56 | H5TIV2 |
| Q6LUL6 | A4YC59 | H2J8S0 | E8WLR5 | G1Y2T0 | D3PXG5 | D4H371 | I0JLI3  | G1WWD1  | C0E9N0 | C2FAS1 | D7H7R8 | H3S1G6 |
| A7N569 | H0JPY6 | C1DUJ4 | H1Y355 | C6XMS4 | Q67NY2 | A1T0Q5 | F8AE73  | C2TR45  | G2LEK5 | H0JUX5 | B0A7H9 | H1KWN2 |
| F0T6P7 | A6Q0Y9 | H1PP18 | A3CV60 | H1G5K6 | C3XL94 | G9XVM7 | D4LEB1  | A3IS01  | E7N9T8 | C2MP64 | D3MQK2 | Q13RV9 |
| Q8ZYK0 | G2EAK5 | B1YFV2 | D5EKW5 | H5WXR1 | C7H114 | D9QT23 | B0P994  | C9Y235  | H6R272 | C1A1D2 | F0RQI7 | Q9LCV3 |
| D3FDH2 | FSXIM9 | Q5WJT4 | A6D305 | D3PVH2 | C5EY57 | C5BHL4 | D9SQ59  | C6W7Y9  | F6B2Q1 | F3NQG1 | D6S9C8 | H1KXC2 |
| Q7NSR9 | E2SEQ4 | B8G134 | E6VTE1 | C7NRQ0 | G1WFF1 | D8G3D4 | B2A185  | G9EDS3  | A4J200 | D0LBV7 | A5WDR5 | F6BAI0 |
| F0PLV0 | H1HWP0 | Q3AJU0 | D2RJ16 | F7PF83 | H7EIP9 | Q911J7 | E3HA11  | A7NLK2  | F3AL88 | Q6SK40 | A0LMA9 | D1YW18 |
| A0KOV1 | A6CH12 | H1PYT1 | H5U2B6 | H1LIC7 | A7HVZ7 | G8OQ79 | F7K243  | C7UHP7  | D3SAQ0 | D3E3S3 | D6TQ13 | Q9L209 |
| D3STM5 | F3B2Z3 | H75G46 | B8CIH1 | G8P2Z6 | C9Z006 | F9N6H8 | H8Y110  | I0V8A8  | I0PX92 | D9QQ45 | D9QBQ8 | E9T6W7 |
| D2RWW7 | G8N3A8 | B6G0W3 | A3IQU1 | G0FXC4 | D7UW72 | D5DPM7 | F2J5A5  | B0CC17  | D9X1V2 | Q1J281 | H1S1S7 | D6TER6 |
| G4RAV9 | Q5L2G5 | H0JYC6 | B4VGZ8 | E9UPE6 | C8P511 | Q9K8K6 | D7A659  | G4F4X6  | E4TV11 | D9R8C0 | G2IS16 | H1D334 |
| D4GS91 | E6GYI6 | H6R966 | D8GM9M | Q38ZB9 | E8PLM7 | D3FW72 | C7CBN2  | A8U9A2  | D7VT52 | F3MIW0 | B4WTA9 | F8ALP3 |
| F0LH06 | C6J3V4 | B5V6Z2 | Q8YTF1 | A4ETW3 | G6L3R5 | D3PXF7 | A4WZG2  | E1QKA7  | I1CWF7 | D3AG13 | F1S322 |        |
| A8USM9 | D0WY73 | G1WQA2 | F4XUW9 | A3IA91 | G0M5U9 | C4RLC0 | H7EK30  | H6LC76  | C7Q9D1 | H1C6M7 | Q82GY9 |        |
| C2WGT6 | Q6FB66 | D4L6Z3 | B2ZA5  | A3TYD7 | D7VD45 | Q47DR3 | B6IRB0  | F8CPF0  | A5FFB5 | E0E1E2 | G7WP78 |        |



**Supplementary Table S2.** Distribution of different motifs (class and sub-class) in seven metal-/nonmetal-binding groups of the ArsR-SmtB proteins in archaea and bacteria. Archaeal and bacterial phyla are indicated against each motif. Numbers in the bracket indicate the total number of sequences.

| Domain             | Group                        | Class                                                       | Sub-class <sup>‡</sup>                                                                                  | Phylum                                                                                                                                      |
|--------------------|------------------------------|-------------------------------------------------------------|---------------------------------------------------------------------------------------------------------|---------------------------------------------------------------------------------------------------------------------------------------------|
| Archaea (271)      | $\alpha$ 3 group (82)        | $\alpha$ 3 (5)                                              | a = CxCx <sub>2</sub> C (1)                                                                             | Euryarchaeota (5)                                                                                                                           |
|                    |                              |                                                             | b = CxCx <sub>3-7</sub> C (2)                                                                           |                                                                                                                                             |
|                    |                              |                                                             | d = Cx <sub>2-8</sub> CxC (1)                                                                           |                                                                                                                                             |
|                    |                              |                                                             | e = CCxC (1)                                                                                            |                                                                                                                                             |
|                    |                              | $\alpha$ 3N (54)                                            | a = C (19)                                                                                              | Euryarchaeota (54)                                                                                                                          |
|                    |                              |                                                             | b = CC (7)                                                                                              |                                                                                                                                             |
|                    |                              |                                                             | c = Cx <sub>3</sub> C (13)                                                                              |                                                                                                                                             |
|                    |                              |                                                             | f = Cx <sub>5</sub> H (2)                                                                               |                                                                                                                                             |
|                    |                              |                                                             | g = Cx <sub>3</sub> H (4)                                                                               |                                                                                                                                             |
|                    | $\alpha$ 32 (23)             | a = CxCx (11)                                               | Euryarchaeota (23)                                                                                      |                                                                                                                                             |
|                    |                              | b = CxCD (3)                                                |                                                                                                         |                                                                                                                                             |
|                    |                              | c = CxCx <sub>3</sub> D (9)                                 |                                                                                                         |                                                                                                                                             |
|                    | $\alpha$ 4 group (12)        | $\alpha$ 4c (12)                                            | NA <sup>‡</sup>                                                                                         | Crenarchaeota (9)<br>Thaumarchaeota (2)<br>Parvarchaeota (1)                                                                                |
|                    | $\alpha$ 5 group (3)         | $\alpha$ 5 (1)<br>$\alpha$ 54 (1)<br>$\alpha$ 55 (1)        | NA <sup>‡</sup>                                                                                         | Euryarchaeota (2)                                                                                                                           |
| Thaumarchaeota (1) |                              |                                                             |                                                                                                         |                                                                                                                                             |
|                    |                              |                                                             |                                                                                                         |                                                                                                                                             |
| MX group (19)      | $\alpha$ 3N- $\alpha$ 5 (16) | a = DxHx <sub>10</sub> Hx <sub>2</sub> E ( $\alpha$ 5) (13) | Euryarchaeota (12)<br>Crenarchaeota (1)                                                                 |                                                                                                                                             |
|                    |                              | b = DxHx <sub>10</sub> Hx <sub>2</sub> H ( $\alpha$ 5) (3)  | Euryarchaeota (3)                                                                                       |                                                                                                                                             |
|                    | $\alpha$ 3- $\alpha$ 5 (3)   | a = DxHx <sub>10</sub> Hx <sub>2</sub> E ( $\alpha$ 5) (2)  | Euryarchaeota (3)                                                                                       |                                                                                                                                             |
|                    |                              | b = DxHx <sub>10</sub> Hx <sub>2</sub> H ( $\alpha$ 5) (1)  |                                                                                                         |                                                                                                                                             |
| NM group (1)       | $\alpha$ 2- $\alpha$ 5 (1)   | NA <sup>‡</sup>                                             | Euryarchaeota (1)                                                                                       |                                                                                                                                             |
| UN group (154)     | None (143)                   | NA <sup>‡</sup>                                             | Euryarchaeota (76)<br>Crenarchaeota (59)<br>Thaumarchaeota (6)<br>Korarchaeota (1)<br>Parvarchaeota (1) |                                                                                                                                             |
|                    | None_C (11)                  |                                                             | Euryarchaeota (7)<br>Crenarchaeota (3)<br>Thaumarchaeota (1)                                            |                                                                                                                                             |
| Bacteria (2833)    | $\alpha$ 2 group (61)        | $\alpha$ 2- $\alpha$ 52 (41)                                | NA <sup>‡</sup>                                                                                         | Proteobacteria (24)<br>Cyanobacteria (15)<br>Bacteroidetes (2)                                                                              |
|                    |                              | $\alpha$ 2- $\alpha$ 53 (20)                                |                                                                                                         | Proteobacteria (17)<br>Firmicutes (2)<br>Cyanobacteria (1)                                                                                  |
|                    | $\alpha$ 3 group (947)       | $\alpha$ 3 (226)                                            | a = CxCx <sub>2</sub> C (72)                                                                            | Proteobacteria (28)<br>Cyanobacteria (22)<br>Firmicutes (16)<br>Chloroflexi (3)<br>Spirochaetes (1)<br>Synergistetes (1)<br>Thermotogae (1) |
|                    |                              |                                                             | b = CxCx <sub>3-7</sub> C (23)                                                                          | Proteobacteria (15)<br>Firmicutes (4)<br>Actinobacteria (1)<br>Cyanobacteria (1)<br>Fusobacteria (1)<br>Tenericutes (1)                     |
|                    |                              |                                                             | c = Cx <sub>3</sub> CxC (70)                                                                            | Firmicutes (65)<br>Actinobacteria (1)<br>Aquificae (1)<br>Cyanobacteria (1)<br>Spirochaetes (1)<br>Tenericutes (1)                          |
|                    |                              |                                                             | d = Cx <sub>2-8</sub> CxC (31)                                                                          | Firmicutes (20)<br>Proteobacteria (7)<br>Actinobacteria (3)<br>Deinococcus-Thermus (1)                                                      |
|                    |                              |                                                             | e = CCxC (29)                                                                                           | Firmicutes (21)<br>Proteobacteria (3)                                                                                                       |

|  |           |                              |                                                                                                                                                                                                                                                                                                                   |
|--|-----------|------------------------------|-------------------------------------------------------------------------------------------------------------------------------------------------------------------------------------------------------------------------------------------------------------------------------------------------------------------|
|  |           |                              | Chloroflexi (2)<br>Actinobacteria (1)<br>Nitrospirae (1)<br>Thermodesulfobacteria (1)                                                                                                                                                                                                                             |
|  |           | f = CxCC (1)                 | Firmicutes (1)                                                                                                                                                                                                                                                                                                    |
|  | α3N (336) | a = C (143)                  | Firmicutes (55)<br>Proteobacteria (46)<br>Actinobacteria (22)<br>Spirochaetes (5)<br>Thermotogae (5)<br>Bacteroidetes (4)<br>Fusobacteria (2)<br>Aquificae (1)<br>Chloroflexi (1)<br>Cyanobacteria (1)<br>Verrucomicrobia (1)                                                                                     |
|  |           | b = CC (106)                 | Actinobacteria (97)<br>Chloroflexi (4)<br>Bacteroidetes (2)<br>Acidobacteria (1)<br>Cyanobacteria (1)<br>Proteobacteria (1)                                                                                                                                                                                       |
|  |           | c = Cx <sub>3</sub> C (16)   | Firmicutes (7)<br>Cyanobacteria (4)<br>Actinobacteria (3)<br>Deinococcus-Thermus (1)<br>Proteobacteria (1)                                                                                                                                                                                                        |
|  |           | d = Cx <sub>8</sub> H (16)   | Actinobacteria (13)<br>Chloroflexi (1)<br>Firmicutes (1)<br>Proteobacteria (1)                                                                                                                                                                                                                                    |
|  |           | e = Cx <sub>12</sub> C (13)  | Bacteroidetes (13)                                                                                                                                                                                                                                                                                                |
|  |           | f = Cx <sub>5</sub> H (12)   | Firmicutes (9)<br>Actinobacteria (1)<br>Cyanobacteria (1)<br>Deinococcus-Thermus (1)                                                                                                                                                                                                                              |
|  |           | o = Others (30)              | Proteobacteria (11)<br>Actinobacteria (6)<br>Bacteroidetes (4)<br>Firmicutes (3)<br>Cyanobacteria (2)<br>Spirochaetes (2)<br>Chloroflexi (1)<br>Verrucomicrobia (1)                                                                                                                                               |
|  | α3N2 (4)  | NA <sup>£</sup>              | Actinobacteria (3)<br>Spirochaetes (1)                                                                                                                                                                                                                                                                            |
|  | α32 (319) | a = CxCx (143)               | Proteobacteria (58)<br>Firmicutes (56)<br>Thermotogae (6)<br>Deferribacteres (5)<br>Spirochaetes (3)<br>Acidobacteria (2)<br>Actinobacteria (2)<br>Bacteroidetes (2)<br>Fusobacteria (2)<br>Synergistetes (2)<br>Aquificae (1)<br>Chlorobi (1)<br>Chloroflexi (1)<br>Nitrospirae (1)<br>Thermodesulfobacteria (1) |
|  |           | b = CxC <sub>D</sub> (120)   | Proteobacteria (44)<br>Firmicutes (32)<br>Actinobacteria (25)<br>Cyanobacteria (9)<br>Deinococcus-Thermus (4)<br>Fusobacteria (2)<br>Gemmatimonadetes (2)<br>Bacteroidetes (1)<br>Thermotogae (1)                                                                                                                 |
|  |           | c = CxCx <sub>3</sub> D (26) | Firmicutes (16)<br>Chloroflexi (2)<br>Proteobacteria (2)<br>Verrucomicrobia (2)                                                                                                                                                                                                                                   |

|  |                        |                   |                                                |                                                                                                                                                                                                                                            |
|--|------------------------|-------------------|------------------------------------------------|--------------------------------------------------------------------------------------------------------------------------------------------------------------------------------------------------------------------------------------------|
|  |                        |                   |                                                | Aquificae (1)<br>Fusobacteria (1)<br>Ignavibacteriae (1)<br>Thermotogae (1)                                                                                                                                                                |
|  |                        |                   | d = CxCH (13)                                  | Proteobacteria (5)<br>Actinobacteria (3)<br>Firmicutes (3)<br>Planctomycetes (1)<br>Verrucomicrobia (1)                                                                                                                                    |
|  |                        |                   | o = Others (17)                                | Firmicutes (7)<br>Proteobacteria (5)<br>Cyanobacteria (2)<br>Aquificae (1)<br>Deferribacteres (1)<br>Fusobacteria (1)                                                                                                                      |
|  |                        | $\alpha$ 34 (16)  | NA <sup>£</sup>                                | Deferribacteres (4)<br>Chlorobi (4)<br>Actinobacteria (3)<br>Aquificae (2)<br>Bacteroidetes (2)<br>Firmicutes (1)                                                                                                                          |
|  |                        | $\alpha$ 35 (46)  |                                                | Bacteroidetes (35)<br>Firmicutes (4)<br>Planctomycetes (3)<br>Proteobacteria (2)<br>Cyanobacteria (1)<br>Chloroflexi (1)                                                                                                                   |
|  | $\alpha$ 4 group (183) | $\alpha$ 4c (143) | NA <sup>£</sup>                                | Actinobacteria (111)<br>Firmicutes (17)<br>Proteobacteria (7)<br>Chloroflexi (5)<br>Acidobacteria (1)<br>Bacteroidetes (1)<br>Cyanobacteria (1)                                                                                            |
|  |                        | $\alpha$ 4c2 (40) |                                                | Actinobacteria (40)                                                                                                                                                                                                                        |
|  | $\alpha$ 5 group (441) | $\alpha$ 5 (313)  | a = DxHx <sub>10</sub> Hx <sub>2</sub> E (186) | Firmicutes (72)<br>Actinobacteria (58)<br>Proteobacteria (29)<br>Spirochaetes (10)<br>Cyanobacteria (8)<br>Fusobacteria (3)<br>Thermotogae (2)<br>Cloacimonetes (1)<br>Deferribacteres (1)<br>Deinococcus-Thermus (1)<br>Synergistetes (1) |
|  |                        |                   | b = DxHx <sub>10</sub> Hx <sub>2</sub> H (127) | Firmicutes (78)<br>Actinobacteria (34)<br>Chloroflexi (5)<br>Synergistetes (3)<br>Proteobacteria (2)<br>Acidobacteria (1)<br>Deferribacteres (1)<br>Deinococcus-Thermus (1)<br>Fibrobacteres (1)<br>Thermotogae (1)                        |
|  |                        | $\alpha$ 5N (33)  | NA <sup>£</sup>                                | Actinobacteria (30)<br>Proteobacteria (2)<br>Firmicutes (1)                                                                                                                                                                                |
|  |                        | $\alpha$ 5c (3)   |                                                | Firmicutes (2)<br>Chloroflexi (1)                                                                                                                                                                                                          |
|  |                        | $\alpha$ 53 (36)  |                                                | Actinobacteria (36)                                                                                                                                                                                                                        |
|  |                        | $\alpha$ 54 (11)  |                                                | Actinobacteria (5)<br>Cyanobacteria (2)<br>Firmicutes (2)<br>Proteobacteria (1)<br>Verrucomicrobia (1)                                                                                                                                     |
|  |                        | $\alpha$ 55 (31)  |                                                | Proteobacteria (14)<br>Actinobacteria (13)<br>Planctomycetes (2)<br>Firmicutes (1)<br>Verrucomicrobia (1)                                                                                                                                  |
|  |                        | $\alpha$ 56 (5)   |                                                | Proteobacteria (3)<br>Planctomycetes (1)                                                                                                                                                                                                   |

|                |                            |                                                               |                |                                                                                                                                                                                                                                                                                                                                                              |                                                                                                                           |                                                        |
|----------------|----------------------------|---------------------------------------------------------------|----------------|--------------------------------------------------------------------------------------------------------------------------------------------------------------------------------------------------------------------------------------------------------------------------------------------------------------------------------------------------------------|---------------------------------------------------------------------------------------------------------------------------|--------------------------------------------------------|
|                |                            |                                                               |                | Cloacimonetes (1)                                                                                                                                                                                                                                                                                                                                            |                                                                                                                           |                                                        |
|                |                            | $\alpha 57$ (9)                                               |                | Proteobacteria (3)<br>Cyanobacteria (2)<br>Actinobacteria (2)<br>Planctomycetes (1)<br>Nitrospirae (1)                                                                                                                                                                                                                                                       |                                                                                                                           |                                                        |
| MX group (280) | $\alpha 3N-\alpha 5$ (217) | a = DxHx <sub>10</sub> Hx <sub>2</sub> E ( $\alpha 5$ ) (169) |                | Firmicutes (109)<br>Deinococcus-Thermus (15)<br>Proteobacteria (15)<br>Cyanobacteria (11)<br>Chlorobi (4)<br>Spirochaetes (4)<br>Fusobacteria (3)<br>Chloroflexi (2)<br>Thermotogae (2)<br>Synergistetes (1)<br>Acetothermia (1)<br>Deferribacteres (1)<br>Gemmatimonadetes (1)                                                                              |                                                                                                                           |                                                        |
|                |                            |                                                               |                | b = DxHx <sub>10</sub> Hx <sub>2</sub> H ( $\alpha 5$ ) (34)                                                                                                                                                                                                                                                                                                 | Firmicutes (21)<br>Actinobacteria (8)<br>Proteobacteria (2)<br>Acidobacteria (1)<br>Cyanobacteria (1)<br>Fusobacteria (1) |                                                        |
|                |                            |                                                               |                | c = CxH ( $\alpha 3$ ) (14)                                                                                                                                                                                                                                                                                                                                  | Actinobacteria (7)<br>Firmicutes (3)<br>Spirochaetes (2)<br>Bacteroidetes (1)<br>Chloroflexi (1)                          |                                                        |
|                |                            |                                                               |                | $\alpha 3N-\alpha 5c$ (1)                                                                                                                                                                                                                                                                                                                                    | Firmicutes (1)                                                                                                            |                                                        |
|                | $\alpha 3N-\alpha 4c$ (1)  | NA <sup>£</sup>                                               | Firmicutes (1) |                                                                                                                                                                                                                                                                                                                                                              |                                                                                                                           |                                                        |
|                | $\alpha 3-\alpha 5$ (61)   | a = DxHx <sub>10</sub> Hx <sub>2</sub> E ( $\alpha 5$ ) (52)  |                |                                                                                                                                                                                                                                                                                                                                                              | Firmicutes (45)<br>Chlorobi (2)<br>Proteobacteria (2)<br>Spirochaetes (1)<br>Synergistetes (1)<br>Thermotogae (1)         |                                                        |
|                |                            |                                                               |                |                                                                                                                                                                                                                                                                                                                                                              | b = DxHx <sub>10</sub> Hx <sub>2</sub> H ( $\alpha 5$ ) (7)                                                               | Firmicutes (5)<br>Acidobacteria (1)<br>Tenericutes (1) |
|                |                            |                                                               |                |                                                                                                                                                                                                                                                                                                                                                              | C = CxHx <sub>2</sub> C ( $\alpha 3$ ) (2)                                                                                | Firmicutes (2)                                         |
| NM group (381) | $\alpha 2-\alpha 5$ (354)  | NA <sup>£</sup>                                               |                | Proteobacteria (327)<br>Firmicutes (9)<br>Chlorobi (7)<br>Cyanobacteria (5)<br>Actinobacteria (1)<br>Bacteroidetes (2)<br>Fusobacteria (1)<br>Spirochaetes (1)<br>Verrucomicrobia (1)                                                                                                                                                                        |                                                                                                                           |                                                        |
|                | $\alpha 33$ (27)           |                                                               |                | Firmicutes (17)<br>Proteobacteria (4)<br>Spirochaetes (2)<br>Tenericutes (2)<br>Actinobacteria (1)<br>Synergistetes (1)                                                                                                                                                                                                                                      |                                                                                                                           |                                                        |
| UN group (540) | None (430)                 | NA <sup>£</sup>                                               |                | Firmicutes (151)<br>Actinobacteria (113)<br>Proteobacteria (102)<br>Bacteroidetes (15)<br>Spirochaetes (13)<br>Planctomycetes (8)<br>Chloroflexi (6)<br>Acidobacteria (5)<br>Cyanobacteria (4)<br>Deferribacteres (3)<br>Aquificae (2)<br>Nitrospirae (2)<br>Acetothermia (1)<br>Dictyoglomi (1)<br>Fibrobacteres (1)<br>Fusobacteria (1)<br>Thermotogae (1) |                                                                                                                           |                                                        |

|  |  |              |  |                     |
|--|--|--------------|--|---------------------|
|  |  |              |  | Verrucomicrobia (1) |
|  |  |              |  | Firmicutes (37)     |
|  |  |              |  | Proteobacteria (19) |
|  |  |              |  | Aquificae (14)      |
|  |  |              |  | Actinobacteria (10) |
|  |  |              |  | Bacteroidetes (4)   |
|  |  |              |  | Chlorobi (4)        |
|  |  |              |  | Cyanobacteria (4)   |
|  |  |              |  | Caldiserica (2)     |
|  |  |              |  | Chloroflexi (2)     |
|  |  |              |  | Chrysiogenetes (2)  |
|  |  |              |  | Deferribacteres (2) |
|  |  |              |  | Fusobacteria (2)    |
|  |  |              |  | Spirochaetes (2)    |
|  |  |              |  | Acidobacteria (1)   |
|  |  |              |  | Dictyoglomi (1)     |
|  |  |              |  | Synergistetes (1)   |
|  |  |              |  | Tenericutes (1)     |
|  |  |              |  | Thermotogae (1)     |
|  |  |              |  | Verrucomicrobia (1) |
|  |  | None_C (110) |  |                     |

\* 'x' denotes any amino acid, C = cysteine, D = aspartic acid, H = histidine, E = glutamic acid; small letters (a, b, c, ..., o) denotes different motif types

£ NA, not applicable

**Supplementary Table S3.** Distribution of different archaeal and bacterial phyla in seven metal-/nonmetal-binding groups ( $\alpha 2$ ,  $\alpha 3$ ,  $\alpha 4$ ,  $\alpha 5$ , MX, NM and UN) of the ArsR-SmtB family.

| <b>Archaea (271)</b>                                                             |                                                                                                                                                                                                                                                                                                                                                                                                                                                                                            |                                                                                                                                                 |                                                                                                                                                                                                                                                                                                                                                                            |                                                                                                                                                                                                                                                                                                                                                                     |                                                                                                                                                                                                                                |                                                                                                                                                                                                                                                                                                                                                                                                                                                                                       |
|----------------------------------------------------------------------------------|--------------------------------------------------------------------------------------------------------------------------------------------------------------------------------------------------------------------------------------------------------------------------------------------------------------------------------------------------------------------------------------------------------------------------------------------------------------------------------------------|-------------------------------------------------------------------------------------------------------------------------------------------------|----------------------------------------------------------------------------------------------------------------------------------------------------------------------------------------------------------------------------------------------------------------------------------------------------------------------------------------------------------------------------|---------------------------------------------------------------------------------------------------------------------------------------------------------------------------------------------------------------------------------------------------------------------------------------------------------------------------------------------------------------------|--------------------------------------------------------------------------------------------------------------------------------------------------------------------------------------------------------------------------------|---------------------------------------------------------------------------------------------------------------------------------------------------------------------------------------------------------------------------------------------------------------------------------------------------------------------------------------------------------------------------------------------------------------------------------------------------------------------------------------|
| <b><math>\alpha 2</math> group (0)</b>                                           | <b><math>\alpha 3</math> group (82)</b>                                                                                                                                                                                                                                                                                                                                                                                                                                                    | <b><math>\alpha 4</math> group (12)</b>                                                                                                         | <b><math>\alpha 5</math> group (3)</b>                                                                                                                                                                                                                                                                                                                                     | <b>MX group (19)</b>                                                                                                                                                                                                                                                                                                                                                | <b>NM group (1)</b>                                                                                                                                                                                                            | <b>UN group (154)</b>                                                                                                                                                                                                                                                                                                                                                                                                                                                                 |
|                                                                                  | Euryarchaeota (82)                                                                                                                                                                                                                                                                                                                                                                                                                                                                         | Crenarchaeota (9)<br>Thaumarchaeota (2)<br>Parvarchaeota (1)                                                                                    | Euryarchaeota (2)<br>Thaumarchaeota (1)                                                                                                                                                                                                                                                                                                                                    | Euryarchaeota (18)<br>Crenarchaeota (1)                                                                                                                                                                                                                                                                                                                             | Euryarchaeota (1)                                                                                                                                                                                                              | Euryarchaeota (83)<br>Crenarchaeota (62)<br>Thaumarchaeota (7)<br>Korarchaeota (1)<br>Parvarchaeota (1)                                                                                                                                                                                                                                                                                                                                                                               |
| <b>Bacteria (2833)</b>                                                           |                                                                                                                                                                                                                                                                                                                                                                                                                                                                                            |                                                                                                                                                 |                                                                                                                                                                                                                                                                                                                                                                            |                                                                                                                                                                                                                                                                                                                                                                     |                                                                                                                                                                                                                                |                                                                                                                                                                                                                                                                                                                                                                                                                                                                                       |
| <b><math>\alpha 2</math> group (61)</b>                                          | <b><math>\alpha 3</math> group (947)</b>                                                                                                                                                                                                                                                                                                                                                                                                                                                   | <b><math>\alpha 4</math> group (183)</b>                                                                                                        | <b><math>\alpha 5</math> group (441)</b>                                                                                                                                                                                                                                                                                                                                   | <b>MX group (280)</b>                                                                                                                                                                                                                                                                                                                                               | <b>NM group (381)</b>                                                                                                                                                                                                          | <b>UN group (540)</b>                                                                                                                                                                                                                                                                                                                                                                                                                                                                 |
| Proteobacteria (41)<br>Cyanobacteria (16)<br>Bacteroidetes (2)<br>Firmicutes (2) | Firmicutes (321)<br>Proteobacteria (229)<br>Actinobacteria (184)<br>Bacteroidetes (63)<br>Cyanobacteria (45)<br>Chloroflexi (16)<br>Spirochaetes (13)<br>Thermotogae (14)<br>Deferribacteres (10)<br>Fusobacteria (9)<br>Aquificae (7)<br>Deinococcus-Thermus (7)<br>Chlorobi (5)<br>Verrucomicrobia (5)<br>Planctomycetes (4)<br>Acidobacteria (3)<br>Synergistetes (3)<br>Gemmatimonadetes (2)<br>Nitrospirae (2)<br>Tenericutes (2)<br>Thermodesulfobacteria (2)<br>Ignavibacteriae (1) | Actinobacteria (151)<br>Firmicutes (17)<br>Proteobacteria (7)<br>Chloroflexi (5)<br>Acidobacteria (1)<br>Bacteroidetes (1)<br>Cyanobacteria (1) | Actinobacteria (178)<br>Firmicutes (156)<br>Proteobacteria (54)<br>Cyanobacteria (12)<br>Spirochaetes (10)<br>Chloroflexi (6)<br>Planctomycetes (4)<br>Synergistetes (4)<br>Fusobacteria (3)<br>Thermotogae (3)<br>Cloacimonetes (2)<br>Deferribacteres (2)<br>Deinococcus-Thermus (2)<br>Verrucomicrobia (2)<br>Acidobacteria (1)<br>Fibrobacteres (1)<br>Nitrospirae (1) | Firmicutes (187)<br>Proteobacteria (19)<br>Actinobacteria (15)<br>Deinococcus-Thermus (15)<br>Cyanobacteria (12)<br>Spirochaetes (7)<br>Chlorobi (6)<br>Fusobacteria (4)<br>Thermotogae (3)<br>Chloroflexi (3)<br>Synergistetes (2)<br>Acidobacteria (2)<br>Acetothermia (1)<br>Deferribacteres (1)<br>Gemmatimonadetes (1)<br>Tenericutes (1)<br>Bacteroidetes (1) | Proteobacteria (331)<br>Firmicutes (26)<br>Chlorobi (7)<br>Cyanobacteria (5)<br>Spirochaetes (3)<br>Actinobacteria (2)<br>Bacteroidetes (2)<br>Tenericutes (2)<br>Fusobacteria (1)<br>Verrucomicrobia (1)<br>Synergistetes (1) | Firmicutes (188)<br>Actinobacteria (123)<br>Proteobacteria (121)<br>Bacteroidetes (19)<br>Aquificae (16)<br>Spirochaetes (15)<br>Chloroflexi (8)<br>Cyanobacteria (8)<br>Planctomycetes (8)<br>Acidobacteria (6)<br>Deferribacteres (5)<br>Chlorobi (4)<br>Fusobacteria (3)<br>Caldiserica (2)<br>Chrysiogenetes (2)<br>Dictyoglomi (2)<br>Nitrospirae (2)<br>Thermotogae (2)<br>Verrucomicrobia (2)<br>Acetothermia (1)<br>Fibrobacteres (1)<br>Synergistetes (1)<br>Tenericutes (1) |

**Supplementary Table S4.** Propensities of 20 amino acid residues in the ArsR-SmtB family. Propensities of residues in major phyla of archaea and bacteria are indicated.

| Amino Acid | Archaea + Bacteria | Archaea |               |               | Bacteria |            |                |                |
|------------|--------------------|---------|---------------|---------------|----------|------------|----------------|----------------|
|            |                    | All     | Euryarchaeota | Crenarchaeota | All      | Firmicutes | Proteobacteria | Actinobacteria |
| Ala        | 8.5                | 5.3     | 5.5           | 5.0           | 8.9      | 5.5        | 9.6            | 13.3           |
| Arg        | 7.0                | 6.8     | 6.7           | 7.2           | 7.0      | 5.1        | 7.9            | 8.6            |
| Asn        | 3.1                | 4.2     | 4.0           | 4.6           | 3.0      | 4.1        | 2.9            | 1.4            |
| Asp        | 5.4                | 5.2     | 5.8           | 3.6           | 5.4      | 5.8        | 4.9            | 5.9            |
| Cys        | 2.7                | 1.7     | 2.1           | 0.7           | 2.8      | 2.9        | 2.7            | 2.4            |
| Gln        | 4.3                | 2.5     | 2.5           | 2.2           | 4.4      | 4.5        | 5.4            | 3.1            |
| Glu        | 7.4                | 9.3     | 9.7           | 8.6           | 7.2      | 8.3        | 7.0            | 6.0            |
| Gly        | 4.8                | 5.0     | 4.7           | 5.6           | 4.8      | 3.9        | 4.6            | 6.6            |
| His        | 3.1                | 2.3     | 2.4           | 2.1           | 3.2      | 3.7        | 2.5            | 3.5            |
| Ile        | 5.6                | 7.8     | 7.6           | 8.1           | 5.4      | 7.3        | 4.8            | 3.1            |
| Leu        | 13.2               | 13.1    | 12.6          | 14.6          | 13.2     | 12.2       | 14.4           | 13.2           |
| Lys        | 5.7                | 8.5     | 8.4           | 8.4           | 5.4      | 8.2        | 4.6            | 2.0            |
| Met        | 2.9                | 2.9     | 3.0           | 2.7           | 2.9      | 3.3        | 3.1            | 2.2            |
| Phe        | 2.2                | 2.5     | 2.4           | 2.4           | 2.2      | 2.8        | 1.9            | 1.3            |
| Pro        | 3.1                | 2.3     | 2.5           | 1.9           | 3.2      | 1.8        | 3.3            | 5.3            |
| Ser        | 6.7                | 6.7     | 6.3           | 7.7           | 6.7      | 6.7        | 7.0            | 6.5            |
| Thr        | 4.6                | 3.9     | 3.9           | 3.7           | 4.7      | 4.4        | 4.4            | 5.5            |
| Trp        | 0.6                | 0.7     | 0.7           | 0.6           | 0.6      | 0.4        | 0.7            | 0.5            |
| Tyr        | 2.5                | 3.5     | 3.3           | 4.1           | 2.4      | 3.0        | 2.3            | 1.6            |
| Val        | 6.6                | 5.9     | 5.8           | 6.3           | 6.7      | 6.2        | 6.0            | 8.2            |

**Supplementary Table S5.** Propensities (in percentage) of 20 amino acids in the ArsR-SmtB family. Propensities of residues in different groups and motifs are shown.

| Amino Acid | $\alpha 2$ group |                      |                      | $\alpha 3$ group |            |             |              |             |             |             | $\alpha 4$ group |             |              | $\alpha 5$ group |            |             |             |             |             |             |             |             | MX group |                      |                     | NM group |                     |             | UN group |      |        |
|------------|------------------|----------------------|----------------------|------------------|------------|-------------|--------------|-------------|-------------|-------------|------------------|-------------|--------------|------------------|------------|-------------|-------------|-------------|-------------|-------------|-------------|-------------|----------|----------------------|---------------------|----------|---------------------|-------------|----------|------|--------|
|            | All              | $\alpha 2-\alpha 52$ | $\alpha 2-\alpha 53$ | All              | $\alpha 3$ | $\alpha 3N$ | $\alpha 3N2$ | $\alpha 32$ | $\alpha 34$ | $\alpha 35$ | All              | $\alpha 4c$ | $\alpha 4c2$ | All              | $\alpha 5$ | $\alpha 5N$ | $\alpha 5c$ | $\alpha 53$ | $\alpha 54$ | $\alpha 55$ | $\alpha 56$ | $\alpha 57$ | All      | $\alpha 3N-\alpha 5$ | $\alpha 3-\alpha 5$ | All      | $\alpha 2-\alpha 5$ | $\alpha 33$ | All      | None | None_C |
| Ala        | 9.4              | 9.0                  | 10.3                 | 7.8              | 6.2        | 9.5         | 6.2          | 7.0         | 6.7         | 7.4         | 12.5             | 12.5        | 12.9         | 9.2              | 8.3        | 13.7        | 6.7         | 12.5        | 11.4        | 9.3         | 7.4         | 9.9         | 7.7      | 7.9                  | 7.1                 | 9.7      | 9.9                 | 7.2         | 7.7      | 7.9  | 6.7    |
| Arg        | 6.9              | 6.9                  | 6.9                  | 6.1              | 5.6        | 6.6         | 5.8          | 6.5         | 5.2         | 2.6         | 8.6              | 8.2         | 10.2         | 7.3              | 6.8        | 9.0         | 6.4         | 9.7         | 6.8         | 7.5         | 6.3         | 7.7         | 6.2      | 6.5                  | 5.4                 | 7.5      | 7.6                 | 5.8         | 7.5      | 7.8  | 6.1    |
| Asn        | 3.5              | 3.5                  | 3.6                  | 3.3              | 3.7        | 2.6         | 1.1          | 3.6         | 4.9         | 4.7         | 2.3              | 2.5         | 1.9          | 2.4              | 2.5        | 1.2         | 2.2         | 2.5         | 2.4         | 2.2         | 2.5         | 2.8         | 2.9      | 2.7                  | 3.4                 | 3.1      | 3.0                 | 4.5         | 3.7      | 3.7  | 3.8    |
| Asp        | 3.5              | 3.6                  | 3.3                  | 5.1              | 5.4        | 5.2         | 4.3          | 5.0         | 4.2         | 4.2         | 6.1              | 5.8         | 7.4          | 6.2              | 6.4        | 5.4         | 5.3         | 6.3         | 5.4         | 5.5         | 6.3         | 4.2         | 6.8      | 6.8                  | 6.9                 | 4.6      | 4.6                 | 4.9         | 5.0      | 5.0  | 4.6    |
| Cys        | 3.5              | 3.4                  | 3.7                  | 3.9              | 5.0        | 3.9         | 4.1          | 3.0         | 4.1         | 5.2         | 3.8              | 3.4         | 5.2          | 1.4              | 1.0        | 0.8         | 0.8         | 0.4         | 4.1         | 4.6         | 4.8         | 3.9         | 3.2      | 3.0                  | 4.0                 | 2.4      | 2.4                 | 3.6         | 1.1      | 0.8  | 2.4    |
| Gln        | 6.3              | 6.6                  | 5.7                  | 4.1              | 4.5        | 3.7         | 6.0          | 4.2         | 3.6         | 5.4         | 2.7              | 3.0         | 1.9          | 4.4              | 4.4        | 4.0         | 4.7         | 4.1         | 4.1         | 5.2         | 4.8         | 3.7         | 3.9      | 4.0                  | 3.7                 | 5.8      | 5.9                 | 4.2         | 4.0      | 3.9  | 4.5    |
| Glu        | 7.0              | 7.1                  | 6.9                  | 7.3              | 7.3        | 7.1         | 5.8          | 7.6         | 8.1         | 7.2         | 5.7              | 5.8         | 4.9          | 7.1              | 7.6        | 5.7         | 7.5         | 6.5         | 7.2         | 5.4         | 5.0         | 5.7         | 8.4      | 8.4                  | 8.2                 | 7.4      | 7.5                 | 6.9         | 7.9      | 7.9  | 8.0    |
| Gly        | 4.4              | 4.4                  | 4.4                  | 4.6              | 3.8        | 5.0         | 5.6          | 4.3         | 4.5         | 6.0         | 7.0              | 7.1         | 6.9          | 4.9              | 4.4        | 7.8         | 4.7         | 5.3         | 4.5         | 4.8         | 4.8         | 6.5         | 3.8      | 3.8                  | 3.6                 | 4.7      | 4.8                 | 3.8         | 5.1      | 5.2  | 4.6    |
| His        | 2.0              | 1.6                  | 2.8                  | 2.6              | 3.0        | 2.5         | 2.8          | 2.5         | 2.7         | 2.5         | 2.5              | 2.6         | 2.3          | 4.9              | 5.2        | 5.5         | 8.3         | 5.5         | 2.6         | 2.7         | 3.0         | 3.1         | 4.2      | 4.2                  | 4.3                 | 2.3      | 2.2                 | 4.3         | 2.8      | 2.8  | 2.8    |
| Ile        | 5.3              | 5.2                  | 5.3                  | 6.1              | 6.1        | 5.2         | 4.7          | 6.8         | 6.6         | 8.8         | 3.4              | 3.3         | 3.8          | 5.0              | 5.8        | 3.2         | 7.5         | 2.9         | 3.7         | 3.4         | 4.6         | 3.5         | 6.0      | 5.7                  | 6.9                 | 4.8      | 4.7                 | 6.6         | 6.4      | 6.3  | 6.6    |
| Leu        | 12.8             | 12.3                 | 14.0                 | 13.4             | 13.4       | 13.5        | 13.9         | 13.8        | 11.6        | 10.8        | 13.7             | 13.6        | 14.0         | 12.9             | 12.9       | 14.5        | 11.4        | 10.0        | 13.9        | 14.0        | 13.0        | 15.0        | 11.7     | 12.1                 | 10.3                | 14.4     | 14.6                | 11.7        | 13.1     | 13.1 | 13.2   |
| Lys        | 4.8              | 4.9                  | 4.4                  | 6.6              | 6.9        | 5.6         | 4.5          | 7.4         | 7.1         | 8.4         | 2.0              | 2.4         | 0.6          | 4.4              | 4.9        | 0.7         | 4.2         | 2.5         | 4.9         | 4.3         | 8.6         | 4.3         | 6.7      | 6.4                  | 7.9                 | 4.7      | 4.5                 | 6.6         | 6.5      | 6.2  | 8.0    |
| Met        | 3.0              | 2.8                  | 3.6                  | 2.7              | 3.0        | 2.5         | 2.8          | 2.8         | 2.8         | 2.4         | 2.0              | 2.0         | 2.0          | 2.8              | 2.9        | 2.0         | 3.1         | 2.8         | 2.8         | 3.0         | 4.6         | 2.8         | 3.2      | 3.1                  | 3.2                 | 3.5      | 3.4                 | 3.8         | 2.8      | 2.9  | 2.6    |
| Phe        | 2.2              | 2.5                  | 1.5                  | 2.3              | 2.6        | 1.9         | 2.8          | 2.4         | 2.5         | 3.3         | 1.4              | 1.6         | 0.7          | 2.2              | 2.4        | 0.3         | 1.9         | 2.0         | 1.8         | 2.0         | 2.7         | 2.1         | 2.7      | 2.6                  | 3.0                 | 1.6      | 1.5                 | 2.9         | 2.5      | 2.5  | 2.7    |
| Pro        | 3.7              | 3.5                  | 3.9                  | 3.5              | 3.0        | 4.1         | 4.9          | 3.1         | 3.2         | 2.9         | 4.2              | 3.9         | 5.2          | 3.2              | 2.9        | 4.2         | 3.9         | 4.0         | 3.4         | 4.7         | 1.3         | 3.8         | 1.6      | 1.8                  | 1.0                 | 2.8      | 2.8                 | 3.1         | 3.1      | 3.2  | 2.8    |
| Ser        | 7.5              | 7.6                  | 7.2                  | 6.7              | 7.0        | 6.7         | 10.9         | 6.5         | 6.0         | 5.3         | 6.6              | 6.8         | 5.7          | 7.1              | 7.3        | 6.4         | 5.0         | 6.2         | 6.8         | 7.5         | 6.1         | 7.0         | 6.1      | 6.1                  | 5.9                 | 7.3      | 7.3                 | 7.6         | 6.5      | 6.5  | 6.6    |
| Thr        | 4.9              | 4.6                  | 5.8                  | 4.5              | 4.5        | 4.9         | 7.1          | 4.0         | 6.4         | 4.9         | 5.8              | 5.9         | 5.4          | 4.5              | 4.4        | 5.3         | 2.8         | 5.0         | 6.3         | 3.4         | 4.4         | 5.3         | 4.1      | 4.0                  | 4.4                 | 4.4      | 4.5                 | 3.4         | 4.6      | 4.8  | 4.0    |
| Trp        | 0.2              | 0.2                  | 0.1                  | 1.0              | 1.2        | 0.9         | 0.2          | 1.0         | 0.8         | 0.7         | 0.1              | 0.1         | 0.0          | 0.2              | 0.2        | 0.0         | 0.3         | 0.5         | 0.6         | 0.9         | 0.2         | 0.1         | 0.1      | 0.1                  | 0.0                 | 0.2      | 0.2                 | 0.7         | 0.7      | 0.7  | 0.5    |
| Tyr        | 2.2              | 2.2                  | 2.3                  | 2.4              | 2.6        | 2.2         | 0.6          | 2.6         | 2.2         | 2.0         | 2.0              | 2.0         | 1.9          | 2.2              | 2.3        | 2.1         | 3.6         | 1.4         | 1.7         | 1.7         | 3.0         | 1.3         | 2.6      | 2.5                  | 2.7                 | 2.6      | 2.6                 | 2.8         | 2.7      | 2.7  | 2.8    |
| Val        | 7.0              | 8.2                  | 4.3                  | 5.8              | 5.1        | 6.3         | 6.0          | 5.7         | 7.0         | 5.4         | 7.5              | 7.6         | 7.1          | 7.7              | 7.4        | 8.2         | 9.7         | 10.0        | 5.5         | 7.9         | 6.9         | 7.4         | 8.2      | 8.3                  | 8.0                 | 6.0      | 6.0                 | 5.5         | 6.3      | 6.2  | 6.7    |



**Supplementary Table S6.** Protein names and the corresponding UniProt IDs of 10 different metal-binding protein families (MerR, CsoR, CopY, NikR, Fur, DtxR, LysR, GntR, TetR, and MarR) are shown. The sequences of these proteins were used for the PCA and the result is shown in Figure 3D.

| MerR         |                          | CsoR         |                 | CopY         |            | NikR         |            | Fur          |            | DtxR         |                           | LysR         |            | GntR                 |            | TetR                    |            | MarR                |            |
|--------------|--------------------------|--------------|-----------------|--------------|------------|--------------|------------|--------------|------------|--------------|---------------------------|--------------|------------|----------------------|------------|-------------------------|------------|---------------------|------------|
| Protein Name | UniProt ID               | Protein Name | UniProt ID      | Protein Name | UniProt ID | Protein Name | UniProt ID | Protein Name | UniProt ID | Protein Name | UniProt ID                | Protein Name | UniProt ID | Protein Name         | UniProt ID | Protein Name            | UniProt ID | Protein Name        | UniProt ID |
| MerR         | P0A183                   | CsoR         | P9WP49          | CopR         | Q9CHA6     | NikR         | P0A6Z6     | Fur          | V6F4Q0     | IdeR         | P9WMH1                    | OxyR         | P0ACQ4     | GntR                 | P10585     | ComR                    | P75952     | AdcR                | Q04102     |
| ZntR         | C3SC52                   | CsoR         | Q32222          | CopY         | Q47839     | NikR         | Q25896     | PerR         | A0A0E0UWH0 | MntR         | Q99VY1                    | ModE         | P0A9G8     | CGL2915 <sup>†</sup> | Q8NLM6     | TetR                    | A0A081PX32 | HucR                | Q9RV71     |
| CueR         | C3TL37                   | CsoR         | A0A151FPC8      | CopY         | Q9F683     | NikR         | D0ZAF0     | Fur          | Q03456     | ScaR         | Q9RFN3                    | FkbR1        | Q9KIF0     | FadR                 | P0A8V6     | TetR                    | P0ACT4     | SlyA                | Q82ZP8     |
| PbrR         | Q58AJ5                   | RcnR         | P64530          | CopY         | A0A081PVW3 | NikR         | C0Q138     | Irr          | O85206     | TroR         | F7IW50                    | MopA         | A0A0M3FG26 | CitO                 | Q2KKB8     | HtrR                    | Q9CHR1     | OhrR                | O34777     |
| SoxR         | P0ACS2                   | DmeR         | NA <sup>§</sup> | CopY         | D0R6D0     |              |            | Mur          | Q1MMB4     | SirR         | Q5HRA0                    | OxyR         | Q5ZZ38     | TM0439 <sup>†</sup>  | Q9WYS0     | XCC2027 <sup>†</sup>    | Q8P940     | MarR                | P27245     |
| MerR         | P22874                   | RicR         | Q07434          |              |            |              |            | Nur          | Q9K4F8     | IdeR         | P9WMH1                    | MopB         | Q08386     | GfcR                 | A0QUD9     | MSMEG_3765 <sup>†</sup> | A0QYS0     | ZitR                | A2RNS2     |
| CadR         | Q93TP7                   | InrS         | Q55554          |              |            |              |            | Zur          | Q65HA6     | DtxR         | WP_010935052 <sup>‡</sup> | LysR         | P03030     | Rv0494 <sup>†</sup>  | P9WMG7     | Rv1685c <sup>†</sup>    | O33187     | MexR                | P52003     |
| TipA         | P0A4T9                   | CopU         | G2FXW0          |              |            |              |            | Fur          | Q65HT6     | SioR         | I6L923                    |              |            | LidR                 | I1Y872     | SczA                    | Q9F8C4     | MgrA                | POC1S0     |
| NolA         | P22537                   | FrmR         | P0AAP3          |              |            |              |            | FurR         | Q8DVA3     | MtsR         | B4U486                    |              |            | PS5454 <sup>†</sup>  | Q87U60     | SczA                    | A0A150NGQ9 | SarZ                | Q5HDG9     |
| BmrR         | P39075                   | CstR         | NA <sup>§</sup> |              |            |              |            | FurA         | P9WN87     |              |                           |              |            | GntR                 | P46833     | SczA                    | Q8DNK2     | Rv2887 <sup>†</sup> | P9WME9     |
| NimR         | NP_439766.1 <sup>‡</sup> |              |                 |              |            |              |            |              |            |              |                           |              |            |                      |            | PsaR                    | I6L8Z6     |                     |            |
| GoIS         | Q8ZRG6                   |              |                 |              |            |              |            |              |            |              |                           |              |            |                      |            |                         |            |                     |            |
| CoaR         | NA <sup>§</sup>          |              |                 |              |            |              |            |              |            |              |                           |              |            |                      |            |                         |            |                     |            |
| AdhC         | P44557                   |              |                 |              |            |              |            |              |            |              |                           |              |            |                      |            |                         |            |                     |            |
| NmiR         | A0A0U1RJ76               |              |                 |              |            |              |            |              |            |              |                           |              |            |                      |            |                         |            |                     |            |

<sup>§</sup>NA = Not Available

<sup>‡</sup>GenBank ID

<sup>†</sup>Gene Name

**Supplementary Table S7.** (A) Sequence length (aa) distribution of the ArsR-SmtB family proteins. (B) Sequence length (aa) distribution in different archaeal and bacterial metal-/nonmetal-binding groups ( $\alpha$ 2,  $\alpha$ 3,  $\alpha$ 4,  $\alpha$ 5, MX, NM and UN) of the ArsR-SmtB family.

(A)

| <b>Domain</b>      | <b>Average</b> | <b>Std. Dev.<sup>§</sup></b> |
|--------------------|----------------|------------------------------|
| Archaea + Bacteria | 114.6          | 12.7                         |
| Archaea            | 112.8          | 16.6                         |
| Bacteria           | 114.8          | 12.3                         |

<sup>§</sup>Standard Deviation

(B)

| <b>Group</b>     | <b>Archaea</b> |                              | <b>Bacteria</b> |                              |
|------------------|----------------|------------------------------|-----------------|------------------------------|
|                  | <b>Average</b> | <b>Std. Dev.<sup>§</sup></b> | <b>Average</b>  | <b>Std. Dev.<sup>§</sup></b> |
| $\alpha$ 2 Group | -              | -                            | 115.4           | 13.8                         |
| $\alpha$ 3 Group | 120.0          | 13.7                         | 113.8           | 11.4                         |
| $\alpha$ 4 Group | 117.1          | 7.1                          | 121.2           | 11.7                         |
| $\alpha$ 5 Group | 116.3          | 20.5                         | 115.3           | 12.2                         |
| MX Group         | 120.1          | 5.7                          | 124.2           | 6.8                          |
| NM Group         | 107.0          | -                            | 111.1           | 11.8                         |
| UN Group         | 107.8          | 17.6                         | 110.6           | 14.3                         |

<sup>§</sup>Standard Deviation

**Supplementary Table S8.** Sequence lengths (aa) distribution in different archaeal and bacterial groups ( $\alpha 2$ ,  $\alpha 3$ ,  $\alpha 4$ ,  $\alpha 5$ , MX, NM, and UN) in the ArsR-SmtB family. Each group has multiple classes of motifs and some classes comprised of several sub-classes. Class-specific averages with standard deviations and individual sub-class averages with standard deviations are mentioned, where applicable.

| Domain   | Group                   | Class                     | Sub-class <sup>‡</sup>    | Average | Std. Dev. <sup>§</sup> |
|----------|-------------------------|---------------------------|---------------------------|---------|------------------------|
| Archaea  | $\alpha 2$ Group        | $\alpha 2$ - $\alpha 52$  | NA <sup>£</sup>           | -       | -                      |
|          |                         | $\alpha 2$ - $\alpha 53$  |                           | -       | -                      |
|          | $\alpha 3$ Group        | $\alpha 3$                | NA <sup>£</sup>           | 123.6   | 10.5                   |
|          |                         | $\alpha 3N$               |                           | 124.5   | 10.5                   |
|          |                         | $\alpha 3N2$              |                           | -       | -                      |
|          |                         | $\alpha 32$               |                           | 108.5   | 14.6                   |
|          |                         | $\alpha 34$               |                           | -       | -                      |
|          |                         | $\alpha 35$               |                           | -       | -                      |
|          | $\alpha 4$ Group        | $\alpha 4c$               | NA <sup>£</sup>           | 117.1   | 7.1                    |
|          |                         | $\alpha 4c2$              |                           | -       | -                      |
|          | $\alpha 5$ Group        | $\alpha 5$                | NA <sup>£</sup>           | 111.0   | -                      |
|          |                         | $\alpha 5N$               |                           | -       | -                      |
|          |                         | $\alpha 5c$               |                           | -       | -                      |
|          |                         | $\alpha 53$               |                           | -       | -                      |
|          |                         | $\alpha 54$               |                           | 139.0   | -                      |
|          |                         | $\alpha 55$               |                           | 99.0    | -                      |
|          | MX Group                | $\alpha 3N$ - $\alpha 5$  | NA <sup>£</sup>           | 119.1   | 5.6                    |
|          |                         | $\alpha 3N$ - $\alpha 5c$ |                           | -       | -                      |
|          |                         | $\alpha 3N$ - $\alpha 4c$ |                           | -       | -                      |
|          |                         | $\alpha 3$ - $\alpha 5$   |                           | 125.3   | 1.5                    |
| NM Group | $\alpha 2$ - $\alpha 5$ | NA <sup>£</sup>           | 107.0                     | -       |                        |
|          | $\alpha 33$             |                           | -                         | -       |                        |
| UN Group | None                    | NA <sup>£</sup>           | 106.3                     | 16.2    |                        |
|          | None_C                  |                           | 127.5                     | 23.6    |                        |
| Bacteria | $\alpha 2$ Group        | $\alpha 2$ - $\alpha 52$  | NA <sup>£</sup>           | 120.9   | 12.2                   |
|          |                         | $\alpha 2$ - $\alpha 53$  |                           | 104.1   | 9.4                    |
|          | $\alpha 3$ Group        | $\alpha 3$                | a = CxCx <sub>2</sub> C   | 113.3   | 10.9                   |
|          |                         |                           | b = CxCx <sub>3-7</sub> C | 116.2   | 8.2                    |
|          |                         |                           | c = Cx <sub>3</sub> CxC   | 108.9   | 6.3                    |
|          |                         |                           | d = Cx <sub>2-8</sub> CxC | 112.5   | 10.4                   |
|          |                         |                           | e = CCxC                  | 113.3   | 7                      |
|          |                         |                           | f = CxCC                  | 99.0    | -                      |
|          |                         |                           | Overall                   | 112.0   | 9.1                    |
|          |                         |                           | $\alpha 3N$               | a = C   | 112.5                  |
|          |                         | b = CC                    |                           | 123.6   | 7.6                    |
|          |                         | c = Cx <sub>3</sub> C     |                           | 124.4   | 8.2                    |
|          |                         | d = Cx <sub>8</sub> H     |                           | 126.4   | 8.7                    |
|          |                         | e = Cx <sub>12</sub> C    |                           | 126.5   | 4.4                    |
|          |                         | f = Cx <sub>5</sub> H     |                           | 119.7   | 6.6                    |
|          |                         | o = Others                | 115.9                     | 8.3     |                        |
|          | Overall                 | 118.3                     | 11.5                      |         |                        |
|          | $\alpha 3N2$            | NA <sup>£</sup>           | 116.8                     | 1.5     |                        |
|          | $\alpha 32$             | a = CxCx                  | 113.6                     | 12.8    |                        |

|                                       |                        |                          |                         |                                                        |       |      |
|---------------------------------------|------------------------|--------------------------|-------------------------|--------------------------------------------------------|-------|------|
|                                       |                        |                          | b = CxCD                | 109.0                                                  | 10.1  |      |
|                                       |                        |                          | c = CxCx <sub>3</sub> D | 107.7                                                  | 10.9  |      |
|                                       |                        |                          | d = CxCH                | 108.9                                                  | 9.5   |      |
|                                       |                        |                          | o = Others              | 108.9                                                  | 10.0  |      |
|                                       |                        |                          | <i>Overall</i>          | 111.0                                                  | 11.6  |      |
|                                       |                        | $\alpha$ 34              | NA <sup>£</sup>         |                                                        | 108.7 | 11.6 |
|                                       |                        |                          |                         | $\alpha$ 35                                            | 111.2 | 8.8  |
|                                       | $\alpha$ 4 Group       | $\alpha$ 4c              | NA <sup>£</sup>         |                                                        | 122.6 | 11.8 |
|                                       |                        | $\alpha$ 4c2             |                         | 116.2                                                  | 9.8   |      |
|                                       | $\alpha$ 5 Group       | $\alpha$ 5               |                         | a = DxHx <sub>10</sub> Hx <sub>2</sub> E               | 115.0 | 12.1 |
|                                       |                        |                          |                         | b = DxHx <sub>10</sub> Hx <sub>2</sub> H               | 111.8 | 11.2 |
|                                       |                        |                          |                         | <i>Overall</i>                                         | 113.7 | 11.8 |
|                                       |                        | $\alpha$ 5N              | NA <sup>£</sup>         |                                                        | 122.5 | 7.8  |
|                                       |                        | $\alpha$ 5c              |                         | 120.0                                                  | 12.1  |      |
|                                       |                        | $\alpha$ 53              |                         | 125.3                                                  | 10.5  |      |
|                                       |                        | $\alpha$ 54              |                         | 114.8                                                  | 17.4  |      |
|                                       |                        | $\alpha$ 55              |                         | 116.7                                                  | 9.8   |      |
|                                       |                        | $\alpha$ 56              |                         | 105.0                                                  | 7.1   |      |
|                                       | $\alpha$ 57            | 106.0                    |                         | 11.6                                                   |       |      |
|                                       | MX Group               | $\alpha$ 3N- $\alpha$ 5  |                         | a = DxHx <sub>10</sub> Hx <sub>2</sub> E ( $\alpha$ 5) | 124.3 | 6.2  |
|                                       |                        |                          |                         | b = DxHx <sub>10</sub> Hx <sub>2</sub> H ( $\alpha$ 5) | 124.4 | 7.1  |
|                                       |                        |                          |                         | c = CxH ( $\alpha$ 3)                                  | 133.4 | 11.5 |
|                                       |                        |                          |                         | <i>Overall</i>                                         | 124.9 | 7.1  |
|                                       |                        | $\alpha$ 3N- $\alpha$ 5c |                         | 148.0                                                  | -     |      |
|                                       |                        | $\alpha$ 3N- $\alpha$ 4c |                         | 103.0                                                  | -     |      |
|                                       |                        | $\alpha$ 3- $\alpha$ 5   |                         | a = DxHx <sub>10</sub> Hx <sub>2</sub> E ( $\alpha$ 5) | 121.7 | 2.9  |
|                                       |                        |                          |                         | b = DxHx <sub>10</sub> Hx <sub>2</sub> H ( $\alpha$ 5) | 121.1 | 2.4  |
| c = CxHx <sub>2</sub> C ( $\alpha$ 3) |                        |                          |                         | 122.0                                                  | -     |      |
| <i>Overall</i>                        | 121.6                  |                          |                         | 2.8                                                    |       |      |
| NM Group                              | $\alpha$ 2- $\alpha$ 5 | NA <sup>£</sup>          |                         | 110.7                                                  | 11.6  |      |
|                                       | $\alpha$ 33            |                          | 115.7                   | 13.1                                                   |       |      |
| UN Group                              | None                   | NA <sup>£</sup>          |                         | 110.3                                                  | 14.3  |      |
|                                       | None_C                 |                          | 112.1                   | 14.6                                                   |       |      |

<sup>§</sup>Standard Deviation

<sup>¥</sup>'x' denotes any amino acid, C = cysteine, D = aspartic acid, H = histidine, E = glutamic acid; small letters (a, b, c, ..., o) denotes different motif types

<sup>£</sup>NA, not applicable



**Supplementary Table S10.** Analysis of sequence similarity networks (SSNs) of the ArsR-SmtB family proteins. In total, 62 amino acid sequences (obtained from Table 2) of the ArsR-SmtB family proteins were used to construct networks based on sequence similarities (SSNs). Nodes represent the ArsR-SmtB family protein sequences and the edge lengths represent the sequence similarities. Detailed sequence information with the group, motif, UniProt ID, gene or protein name, organism name, domain, phylum, node number (as shown in Figure 9) and the number of edges, depending on the alignment score stringency ( $10^{-5}$ ,  $10^{-10}$ ,  $10^{-15}$  and  $10^{-20}$ ), are given.

| Group            | No.              | Motif                | UniProt ID  | Protein / Gene Name            | Organism                           | Domain                            | Phylum          | Node No. <sup>†</sup> | Edges <sup>‡</sup> |            |            |            |   |
|------------------|------------------|----------------------|-------------|--------------------------------|------------------------------------|-----------------------------------|-----------------|-----------------------|--------------------|------------|------------|------------|---|
|                  |                  |                      |             |                                |                                    |                                   |                 |                       | $10^{-5}$          | $10^{-10}$ | $10^{-15}$ | $10^{-20}$ |   |
| $\alpha 2$ group | 1-3              | $\alpha 2-\alpha 53$ | Q8Z4F5      | STY2917                        | <i>Salmonella typhi</i>            | Bacteria                          | Proteobacteria  | 26                    | 26                 | 7          | 0          | 0          |   |
|                  |                  | $\alpha 2-\alpha 5$  | P52695      | HlyU                           | <i>Vibrio cholerae</i>             | Bacteria                          | Proteobacteria  |                       |                    |            |            |            |   |
|                  |                  | None                 | Q83TD2      | NoIR                           | <i>Rhizobium fredii</i>            | Bacteria                          | Proteobacteria  |                       |                    |            |            |            |   |
|                  | 4                | $\alpha 2-\alpha 52$ | D6CM11      | AioF                           | <i>Thiomonas arsenitoxydans</i>    | Bacteria                          | Proteobacteria  | 38                    | 14                 | 1          | 0          | 0          |   |
| $\alpha 3$ group | 5                | $\alpha 3$           | Q5KUX7      | ArsR1                          | <i>Geobacillus kaustophilus</i>    | Bacteria                          | Firmicutes      | 1                     | 37                 | 27         | 3          | 0          |   |
|                  | 6                | $\alpha 3$           | C7NYS3      | Hmuk_2504                      | <i>Halomicrobium mukohataei</i>    | Archaea                           | Euryarchaeota   | 2                     | 37                 | 21         | 1          | 0          |   |
|                  | 7-9              | $\alpha 3$           | P15905      | ArsR                           | <i>Escherichia coli</i>            | Bacteria                          | Proteobacteria  | 17                    | 30                 | 12         | 2          | 0          |   |
|                  |                  | $\alpha 55$          | D7H7R8      | VCRC385_01870                  | <i>Vibrio cholerae</i>             | Bacteria                          | Proteobacteria  |                       |                    |            |            |            |   |
|                  |                  | $\alpha 32$          | A0A0A7HMJ3  | ArsR1                          | <i>Pantoea</i> sp.                 | Bacteria                          | Proteobacteria  |                       |                    |            |            |            |   |
|                  | 10               | $\alpha 3$           | S0AS94      | ArsR                           | <i>Ferroplasma acidarmanus</i>     | Archaea                           | Euryarchaeota   | 25                    | 27                 | 10         | 1          | 0          |   |
|                  | 11-12            | $\alpha 32$          | Q46BU5      | Mbar_A1705                     | <i>Methanosarcina barkeri</i>      | Archaea                           | Euryarchaeota   | 12                    | 32                 | 19         | 3          | 0          |   |
|                  | $\alpha 3$       | D5E6K8               | Mmah_1294   | <i>Methanohalophilus mahii</i> | Archaea                            | Euryarchaeota                     |                 |                       |                    |            |            |            |   |
|                  | 13               | $\alpha 3$           | P30338      | ArsR                           | <i>Staphylococcus aureus</i>       | Bacteria                          | Firmicutes      | 24                    | 27                 | 10         | 0          | 0          |   |
|                  | 14               | $\alpha 32$          | G7WP58      | Mhar_1538                      | <i>Methanosaeta harundinacea</i>   | Archaea                           | Euryarchaeota   | 8                     | 33                 | 14         | 0          | 0          |   |
|                  | 15               | $\alpha 32$          | A1XP68      | ArsR1                          | <i>Ochrobactrum tritici</i>        | Bacteria                          | Proteobacteria  | 32                    | 21                 | 6          | 1          | 0          |   |
|                  | 16               | $\alpha 32$          | A5JSW5      | ArsRC                          | <i>Leptospirillum ferriphilum</i>  | Bacteria                          | Nitrospirae     | 35                    | 18                 | 3          | 1          | 0          |   |
|                  | 17-18            | $\alpha 3N$          | P71941      | Rv2642                         | <i>Mycobacterium tuberculosis</i>  | Bacteria                          | Actinobacteria  | 3                     | 35                 | 24         | 3          | 0          |   |
|                  | $\alpha 3N$      | Q1HW04               | ArsR2       | <i>Streptomyces</i> sp.        | Bacteria                           | Actinobacteria                    |                 |                       |                    |            |            |            |   |
|                  | 19               | $\alpha 3N$          | P20047      | CadC                           | <i>Staphylococcus aureus</i>       | Bacteria                          | Firmicutes      | 20                    | 30                 | 13         | 3          | 0          |   |
|                  | 20               | $\alpha 3N$          | F0LM33      | TERMP_00904                    | <i>Thermococcus barophilus</i>     | Archaea                           | Euryarchaeota   | 19                    | 30                 | 8          | 0          | 0          |   |
|                  | 21               | $\alpha 3N$          | O52029      | ArsR1                          | <i>Halobacterium salinarum</i>     | Archaea                           | Euryarchaeota   | 30                    | 22                 | 7          | 1          | 1          |   |
|                  | 22               | $\alpha 3N$          | O52026      | ArsR2                          | <i>Halobacterium salinarum</i>     | Archaea                           | Euryarchaeota   | 34                    | 19                 | 8          | 1          | 1          |   |
|                  | 23               | $\alpha 3N2$         | Q8NTP5      | ArsR2                          | <i>Corynebacterium glutamicum</i>  | Bacteria                          | Actinobacteria  | 14                    | 32                 | 8          | 1          | 0          |   |
|                  | 24               | $\alpha 34$          | Q1HW01      | ArsR1                          | <i>Streptomyces</i> sp.            | Bacteria                          | Actinobacteria  | 15                    | 31                 | 8          | 0          | 0          |   |
|                  | 25               | $\alpha 34$          | D3PAR7      | DEFDS_0179                     | <i>Deferribacter desulfuricans</i> | Bacteria                          | Deferribacteres | 28                    | 24                 | 5          | 0          | 0          |   |
|                  | 26-27            | $\alpha 35$          | H8XU33      | KQS_04180                      | <i>Flavobacterium indicum</i>      | Bacteria                          | Bacteroidetes   | 36                    | 18                 | 2          | 1          | 0          |   |
|                  | $\alpha 55$      | A6L7W8               | ArsR        | <i>Bacteroides vulgatus</i>    | Bacteria                           | Bacteroidetes                     |                 |                       |                    |            |            |            |   |
|                  | 28               | $\alpha 32$          | A0A1B3X802  | ArsR                           | <i>Campylobacter coli</i>          | Bacteria                          | Proteobacteria  | 23                    | 28                 | 12         | 0          | 0          |   |
|                  | $\alpha 4$ group | 29                   | $\alpha 4c$ | Q4J865                         | Saci_1710                          | <i>Sulfolobus acidocaldarius</i>  | Archaea         | Crenarchaeota         | 4                  | 35         | 18         | 1          | 0 |
|                  |                  | 30-31                | $\alpha 4c$ | P9WMI9                         | CmtR                               | <i>Mycobacterium tuberculosis</i> | Bacteria        | Actinobacteria        | 29                 | 24         | 2          | 0          | 0 |
| $\alpha 4c2$     |                  | Q9RD34               | CmtR        | <i>Streptomyces coelicolor</i> | Bacteria                           | Actinobacteria                    |                 |                       |                    |            |            |            |   |
| $\alpha 5$ group | 32               | $\alpha 5$           | O85142      | CzrA                           | <i>Staphylococcus aureus</i>       | Bacteria                          | Firmicutes      | 22                    | 29                 | 14         | 2          | 1          |   |
|                  | 33               | $\alpha 53$          | O53838      | KmtR                           | <i>Mycobacterium tuberculosis</i>  | Bacteria                          | Actinobacteria  | 21                    | 30                 | 15         | 2          | 0          |   |
|                  | 34               | $\alpha 54$          | Q8PZ32      | MM_0662                        | <i>Methanosarcina mazei</i>        | Archaea                           | Euryarchaeota   | 16                    | 31                 | 14         | 0          | 0          |   |

|                        |                        |                         |            |                               |                                          |               |                |    |    |    |   |   |
|------------------------|------------------------|-------------------------|------------|-------------------------------|------------------------------------------|---------------|----------------|----|----|----|---|---|
|                        | 35                     | $\alpha$ 54             | Q9L209     | SCO6823                       | <i>Streptomyces coelicolor</i>           | Bacteria      | Actinobacteria | 33 | 21 | 1  | 0 | 0 |
|                        | 36                     | $\alpha$ 54             | H0HHH0     | ArsR1                         | <i>Agrobacterium tumefaciens</i>         | Bacteria      | Proteobacteria | 42 | 5  | 1  | 0 | 0 |
|                        | 37                     | $\alpha$ 55             | A9A197     | Nmar_0487                     | <i>Nitrosopumilus maritimus</i>          | Archaea       | Thaumarchaeota | 27 | 25 | 15 | 1 | 0 |
|                        | 38                     | $\alpha$ 56             | B6WXY3     | DESPIG_02964                  | <i>Desulfovibrio piger</i>               | Bacteria      | Proteobacteria | 6  | 34 | 15 | 1 | 0 |
|                        | 39-40                  | $\alpha$ 5N             | O69711     | NmtR                          | <i>Mycobacterium tuberculosis</i>        | Bacteria      | Actinobacteria | 39 | 11 | 6  | 2 | 0 |
|                        | 40                     | $\alpha$ 5c             | D6TY78     | Krac_4094                     | <i>Ktedonobacter racemifer</i>           | Bacteria      | Chloroflexi    |    |    |    |   |   |
|                        | 41                     | $\alpha$ 57             | E6XPL1     | ArsR                          | <i>Shewanella putrefaciens</i>           | Bacteria      | Proteobacteria | 31 | 22 | 3  | 0 | 0 |
| MX group               | 42-45                  | $\alpha$ 3N             | A6URK8     | Mevan_1232                    | <i>Methanococcus vannielii</i>           | Archaea       | Euryarchaeota  | 13 | 32 | 22 | 9 | 3 |
|                        |                        | $\alpha$ 3N- $\alpha$ 5 | D1YYC1     | MCP_1371                      | <i>Methanocella paludicola</i>           | Archaea       | Euryarchaeota  |    |    |    |   |   |
|                        |                        | $\alpha$ 3- $\alpha$ 5  | G7V7Y6     | Tlie_0487                     | <i>Thermovirga lienii</i>                | Bacteria      | Synergistetes  |    |    |    |   |   |
|                        |                        | $\alpha$ 3- $\alpha$ 5  | D3E3S3     | mru_1334                      | <i>Methanobrevibacter ruminantium</i>    | Archaea       | Euryarchaeota  |    |    |    |   |   |
|                        | 46                     | $\alpha$ 3N- $\alpha$ 5 | I0RKP2     | MXEN_15450                    | <i>Mycobacterium xenopi</i>              | Bacteria      | Actinobacteria | 10 | 33 | 20 | 1 | 0 |
|                        | 47-51                  | $\alpha$ 3N             | Q8ZS91     | AztR                          | <i>Nostoc</i> sp.                        | Bacteria      | Cyanobacteria  | 18 | 30 | 19 | 4 | 3 |
|                        |                        | $\alpha$ 5              | P30340     | SmtB                          | <i>Synechococcus elongatus</i>           | Bacteria      | Cyanobacteria  |    |    |    |   |   |
|                        |                        | $\alpha$ 3N- $\alpha$ 5 | Q76L30     | BxmR                          | <i>Oscillatoria brevis</i>               | Bacteria      | Cyanobacteria  |    |    |    |   |   |
|                        |                        | $\alpha$ 3N- $\alpha$ 5 | Q55940     | ZiaR                          | <i>Synechocystis</i> sp.                 | Bacteria      | Cyanobacteria  |    |    |    |   |   |
|                        | 52-55                  | $\alpha$ 3N- $\alpha$ 5 | D9SQ59     | Clocel_0346                   | <i>Clostridium cellulovorans</i>         | Bacteria      | Firmicutes     | 5  | 34 | 21 | 7 | 4 |
|                        |                        | $\alpha$ 5              | Q0W2G2     | RCIX2336                      | <i>Methanocella arvoryzae</i>            | Archaea       | Euryarchaeota  |    |    |    |   |   |
|                        |                        | $\alpha$ 3- $\alpha$ 5  | G5GIP9     | HMPREF9333_01439              | <i>Johnsonella ignava</i>                | Bacteria      | Firmicutes     |    |    |    |   |   |
| $\alpha$ 3- $\alpha$ 5 |                        | Q0W191                  | RRC76      | <i>Methanocella arvoryzae</i> | Archaea                                  | Euryarchaeota |                |    |    |    |   |   |
| 56                     | $\alpha$ 3- $\alpha$ 5 | C6D253                  | Pjdr2_3307 | <i>Paenibacillus</i> sp.      | Bacteria                                 | Firmicutes    | 11             | 33 | 22 | 4  | 3 |   |
| NM group               | 57                     | $\alpha$ 2- $\alpha$ 5  | H3ZMT0     | OCC_05651                     | <i>Thermococcus litoralis</i>            | Archaea       | Euryarchaeota  | 37 | 15 | 1  | 0 | 0 |
|                        | 58                     | $\alpha$ 33             | G0HMP2     | GQS_02890                     | <i>Thermococcus</i> sp.                  | Archaea       | Euryarchaeota  | 9  | 33 | 16 | 2 | 0 |
|                        | 59                     | $\alpha$ 33             | A9KR37     | Cphy_0116                     | <i>Lachnoclostridium phytofermentans</i> | Bacteria      | Firmicutes     | 41 | 6  | 1  | 0 | 0 |
| UN group               | 60                     | $\alpha$ 33             | A4QI86     | CyeR                          | <i>Corynebacterium glutamicum</i>        | Bacteria      | Actinobacteria | 7  | 34 | 14 | 0 | 0 |
|                        | 61                     | None_C                  | D1YW18     | MCP_0568                      | <i>Methanocella paludicola</i>           | Archaea       | Euryarchaeota  | 40 | 9  | 1  | 0 | 0 |
|                        | 62                     | None                    | Q9HW47     | PyeR                          | <i>Pseudomonas aeruginosa</i>            | Bacteria      | Proteobacteria | 43 | 1  | 0  | 0 | 0 |

†Node number (from Figure 9)

‡Number of edges connected to a particular node (alignment score stringency, from  $10^{-5}$  to  $10^{-20}$ , see Figure 9)
